1 ***Rostrocaudal patterning and neural crest differentiation of human pre-neural***  
2 ***spinal cord progenitors in vitro***

3

4 **SHORT TITLE**

5 Rostrocaudal patterning of pre-neural spinal cord progenitors

6

7 **AUTHORS**

8 Fay Cooper<sup>1\*</sup>, George E Gentsch<sup>1</sup>, Richard Mitter<sup>2</sup>, Camille Bouissou<sup>1</sup>, Lyn Healy<sup>3</sup>, Ana Hernandez  
9 Rodriguez<sup>1</sup>, James C Smith<sup>1</sup> and Andreia S Bernardo<sup>1,#a</sup>

10

11 **AFFILIATIONS**

12 <sup>1</sup>Developmental Biology Laboratory, The Francis Crick Institute, 1 Midland Road, London, NW1 1AT,  
13 UK

14 <sup>2</sup>Bioinformatics & Biostatistics Core Facility, The Francis Crick Institute, 1 Midland Road, London, NW1  
15 1AT, UK

16 <sup>3</sup>Human Embryo and Stem Cell Unit, The Francis Crick Institute, 1 Midland Road, London, NW1 1AT,  
17 UK

18 <sup>#a</sup> National Heart and Lung Institute, Imperial College London, UK

19

20 \*Corresponding author

21 Fay Cooper (fay.cooper@crick.ac.uk)

22

23

24

25

26

27

28

29

30

31

32

## 33 **ABSTRACT**

34 The spinal cord emerges from a niche of neuromesodermal progenitors (NMPs) formed and  
35 maintained by Wnt/FGF signals at the posterior end of the embryo. NMPs can be generated from  
36 human pluripotent stem cells and hold promise for spinal cord replacement therapies. However,  
37 NMPs are transient, which complicates the full range production of rostrocaudal spinal cord  
38 identities *in vitro*. Here we report the generation of NMP-derived pre-neural progenitors (PNPs) with  
39 stem cell-like self-renewal capacity. PNPs maintain pre-spinal cord identity by co-expressing the  
40 transcription factors SOX2 and CDX2, and lose mesodermal potential by downregulating TBXT. For 7  
41 to 10 passages PNPs divide to self-renew and to make trunk neural crest (NC), while gradually adopting  
42 a more posterior identity by activating colinear *HOX* gene expression. This HOX clock can be halted at  
43 the thoracic level for up to 30 passages by blocking the trunk-to-tail transition through GDF11-  
44 mediated signal inhibition.

45

## 46 **INTRODUCTION**

47 Pluripotent stem cells (PSCs) have become an important tool for the study of mammalian  
48 development. Directed differentiation of PSCs *in vitro* has given significant insights to the signals and  
49 gene regulatory networks which are important for cell fate decisions (Baillie-Benson et al., 2020). In  
50 particular, PSC-derived neural stem cells (NSCs) are often an effective starting point in understanding  
51 both neural development and disease, and have great potential for use in regenerative medicine  
52 (Snyder, 2017). However, to use *in vitro* NSCs in this way, differentiation protocols must recapitulate *in*  
53 *vivo* by following the correct developmental route and must reproducibly generate a well characterized  
54 NSC population. The therapeutic value of human NCSs hinges on them adopting the correct region-  
55 specific identities and adapting properly to their local microenvironments (Kadoya et al., 2016,  
56 Kumamaru et al., 2018, Nagoshi et al., 2019). For example, patients with motor neuron disease or  
57 spinal cord injuries often display lesions in specific neuronal cell types. Hence, effective therapeutic  
58 repair depends on developing protocols that reliably generate these neuronal subtypes from induced  
59 pluripotent stem cells (iPSCs)(Trawczynski et al., 2019, Nijssen et al., 2017).

60

61 Not surprisingly, the development of parts of our central nervous system *in vitro* has been inspired by  
62 our knowledge of mammalian neurogenesis. Forebrain and midbrain develop from the anterior neural  
63 plate, a naïve tissue neuralised by the underlying axial mesoderm through the release of TGF- $\beta$   
64 inhibitors (Cajal et al., 2012, Mathis and Nicolas, 2000). Spinal cord arises from a progenitor pool of  
65 neuromesodermal progenitors (NMPs) that reside in the caudal lateral epiblast/node streak border  
66 and later the chordoneural hinge (Wilson et al., 2009). NMPs are bi-potent and give rise to both the

67 posterior neural tube and adjacent somite-forming paraxial mesoderm (Cambray and Wilson, 2002,  
68 Cambray and Wilson, 2007, Delfino-Machin et al., 2005, Tzouanacou et al., 2009, Brown and Storey,  
69 2000). NMPs are maintained by the synergistic action of FGF and Wnt signals which activate the co-  
70 expression of the transcription factors *TBXT*, *SOX2* and *CDX2*. *TBXT* and *SOX2* are mutually antagonistic  
71 cell fate determinants for the mesodermal and neuroectodermal germ layers, respectively  
72 (Wymeersch et al., 2016, Henrique et al., 2015, Tsakiridis et al., 2014, Gouti et al., 2017, Koch et al.,  
73 2017). *CDX2* conveys increasingly more posterior identity to NMP descendants by inducing colinear  
74 *HOX(1-13)* gene expression during axial elongation (van den Akker et al., 2002, van de Ven et al., 2011,  
75 Neijts et al., 2017, Amin et al., 2016). The human *HOX* genes are expressed in a spatial and temporal  
76 order that is colinear with their physical 3' to 5' genomic position, and assign overlapping regional  
77 identity to the brain and vertebral segments of the spinal cord: *HOX1-5*, hindbrain; *HOX4-6*, cervical;  
78 *HOX6-9*, thoracic and *HOX10-13*, lumbosacral (Philippidou and Dasen, 2013).

79  
80 As the rostrocaudal axis elongates, NMPs that enter the primitive streak downregulate *SOX2*,  
81 upregulate *TBX6*, and contribute to the developing somites (Takemoto et al., 2011, Javali et al., 2017).  
82 Their alternative commitment to pre-neural progenitors (PNPs) begins in the pre-neural tube (PNT),  
83 located immediately rostral to the NMP niche (Diez del Corral et al., 2002). In the PNT, cells no longer  
84 express *TBXT*, but maintain expression of *SOX2* and *NKX1-2* (Olivera-Martinez and Storey, 2007, Storey  
85 et al., 1998). Neurogenic genes such as *PAX6* and *NEUROG2* are not robustly expressed yet in this  
86 region due to the repressive effect of continued FGF signalling on retinoic acid (RA) production (Lunn  
87 et al., 2007, Diez del Corral et al., 2003). The next step of neural commitment is then prompted by the  
88 exposure of PNPs to RA from the adjacent somites as they migrate out of the PNT region and into the  
89 neural tube. The switch from FGF to RA-mediated signalling alleviates repression of the neural  
90 transcription factors *PAX6* and *IRX3* and down regulates *NKX1-2* (Sasai et al., 2014, Diez del Corral et  
91 al., 2003, Shum et al., 1999).

92  
93 Attempts have been made *in vitro* to recapitulate the developmental pathways leading to anterior or  
94 posterior NSCs. Brain forming anterior NSCs can be generated from human PSCs (hPSCs) via dual TGF-  
95  $\beta$  (Activin/BMP) inhibition (Chambers et al., 2009). Initial attempts to generate spinal cord progenitors  
96 relied on posteriorising anterior NSCs through exposure to retinoic acid (Mazzoni et al., 2013,  
97 Wichterle et al., 2002, Lee et al., 2007, Li et al., 2005). This yielded neural derivatives as far posterior  
98 as hindbrain and upper cervical regions, primarily through saltatory expression of *HOX(1-5)* genes.  
99 Following these studies, and consistent with *in vivo* evidence, combined Wnt and FGF stimulation  
100 efficiently converted mouse and human PSCs into NMP-like cells (Turner et al., 2014, Gouti et al., 2014,

101 Lippmann et al., 2015, Frith et al., 2018, Verrier et al., 2018, Peljto et al., 2010). Neural progenitors  
102 derived from NMP-like cells and generated using Wnt/FGF stimulation are capable of undergoing a  
103 more complete range of regionalisation along the rostrocaudal axis, generating neural progenitors up  
104 to lumbar identity (HOX10) (Lippmann et al., 2015, Kumamaru et al., 2018, Wind et al., 2020).  
105 Furthermore, NMP-like cells have become very informative in studying the intricate cell fate decisions  
106 and dynamics of spinal cord formation (Metzis et al., 2018, Gouti et al., 2017, Gouti et al., 2014, Edri  
107 et al., 2019, Rayon et al., 2020).

108

109 Work using hPSCs to study spinal cord formation is still preliminary. Here we describe the *in vitro*  
110 conditions which commit hPSC-derived NMPs to PNPs. These PNPs are stable for up to 10 passages  
111 (30 days). They can acquire the full range of rostrocaudal identities, including the most posterior  
112 (sacral) identity represented by HOX11-13 gene expression, produce trunk neural crest (NC) and  
113 region-specific spinal cord tissue (e.g. motor neurons and interneuron subtypes). Interestingly, the  
114 culture of thoracic PNPs can be massively extended by suppressing TGF- $\beta$ /GDF11-mediated signalling,  
115 which in line with previous *in vivo* findings blocks the trunk-to-tail transition (Aires et al., 2019, Jurberg  
116 et al., 2013). Together, we present a well characterised, reproducible and simple protocol which holds  
117 the potential to model several aspects spinal cord and trunk NC formation *in vitro*.

118

## 119 **RESULTS**

### 120 **Optimising the generation of NMP-like cells from hPSCs through Wnt modulation**

121 Previous studies have shown that Wnt/FGF signalling causes mouse and hPSCs to adopt  
122 neuromesodermal bipotency (Turner et al., 2014, Gouti et al., 2014, Lippmann et al., 2015, Frith et al.,  
123 2018, Verrier et al., 2018). Human NMP protocols differ in both the magnitude and time window of  
124 Wnt stimulation, as well as with respect to the addition of other signal modulators including FGF  
125 (Figure S1A)(Wang et al., 2019, Gouti et al., 2014, Frith et al., 2018, Edri et al., 2019, Verrier et al.,  
126 2018, Lippmann et al., 2015, Gomez et al., 2019, Kumamaru et al., 2018, Denham et al., 2015). To find  
127 the critical Wnt signalling threshold for the generation of NMP-like cells from the WA09 (H9) hESC  
128 line, cells were seeded at a fixed density and 24h later exposed to increasing concentrations of the  
129 canonical Wnt agonist CHIR99021 (CHIR) while keeping FGF2 ligands constant (Figure 1A). Our culture  
130 medium lacked the retinoic acid (RA) precursor vitamin A (retinol) and contained the pan-RA receptor  
131 (RAR) inverse agonist AGN193109 (AGN) (Klein et al., 1996). RA neuralises multipotent cells, so its  
132 degradation by CYP26A1 is essential for NMP maintenance (Sakai et al., 2001, Abu-Abed et al., 2001,  
133 Martin and Kimelman, 2010). Yet, the RA receptor gamma (RAR $\gamma$ ) is highly expressed in NMPs  
134 suggesting that transcriptional repression mediated by RAR $\gamma$  in the absence of its ligand supports

135 NMPs and rostrocaudal axis elongation (Janesick et al., 2014). AGN addition reduced aldehyde  
136 dehydrogenase (ALDH) activity indicating that endogenous RA synthesis was decreased (Figure S1B).

137

138 After 36h, when cultures reached confluency, cells were analysed for SOX2, TBXT and CDX2 expression  
139 by immunofluorescence (Figure 1B,C). Low concentrations of CHIR (0-1 $\mu$ M) caused cells to express  
140 high SOX2 and to be negative for TBXT and CDX2. At 3 $\mu$ M CHIR, TBXT and CDX2 protein became  
141 detectable in some cells. At 5-10 $\mu$ M CHIR, TBXT and CDX2 levels were further elevated, while SOX2  
142 expression decreased with increasing concentrations of CHIR. Bearing in mind the role of POU5F1 (also  
143 known as OCT4) in maintaining pluripotency and axis elongation (Aires et al., 2016, Gouti et al., 2017),  
144 we also analysed expression of this protein at increasing CHIR concentrations. As expected, when cells  
145 were treated with rising CHIR concentrations, OCT4 expression was lost (Figure S1C,D). Based on the  
146 co-expression of OCT4, SOX2, CDX2 and TBXT proteins, we determined that 5 $\mu$ M CHIR was the optimal  
147 concentration to generate NMP-like cells from H9 hESCs at this cell density in 36h. We could also  
148 reliably generate NMP-like cells from WA01 (H1) hESCs and the AICS-ZO1-GFP iPSC line, which also  
149 required intermediate (but different) levels of Wnt activation (Figure S2A,B,E,F). These data show that  
150 optimising the magnitude of Wnt signalling is important for obtaining NMP-like cells from different  
151 PSC lines.

152

### 153 **Transcriptional profiling reveals a common NMP gene set**

154 To further characterise our NMP-like cells, Wnt/FGF-induced transcriptional changes in H9 hPSCs were  
155 quantified by bulk RNA sequencing (RNA-Seq). 1,367 genes were significantly differentially expressed  
156 between hESC and NMP stages (445 up and 922 down; FDR <1%, a fold change of at least  $\pm 2$ , and a  
157 base mean >100) (Supplementary file 1). The biological processes most significantly enriched within  
158 upregulated genes included 'anterior-posterior pattern specification' and 'regionalisation', processes  
159 which reflect the roles of NMPs *in vivo* (Figure 1D). To define a common gene set expressed by *in vitro*  
160 NMPs, we compared our gene list of upregulated genes with two other NMP-related gene expression  
161 studies (Verrier et al., 2018, Frith et al., 2018). The comparison revealed 26 genes that were  
162 consistently upregulated in all three studies (Figure 1E, F). Among these were well-established NMP  
163 markers such as TBXT, WNT8A, CDX2, FGF17, FST and NKX1-2 (Figure 1F). Several novel genes were  
164 also identified, including AC007277.3, a long non-coding transcript, and TTC29 and EGFLAM, all of  
165 which may be useful as NMP markers. Overall, our results show that hPSC-derived NMPs generated  
166 in the absence of RA signalling express known *in vivo* NMP marker genes and share a distinct gene  
167 signature with other *in vitro* hPSC-derived NMPs.

168

169 **Prolonged culture of NMPs results in loss of mesodermal potency and the emergence of**  
170 **epithelial SOX2<sup>+</sup>/CDX2<sup>+</sup> colonies**

171 NMPs have previously been maintained in culture for up to seven days (Lippmann et al., 2015), but it  
172 is necessary to culture them for longer than this to create enough cells for developmental and  
173 therapeutic assays. We sought to extend the culture of spinal cord progenitors by generating the  
174 posterior (SOX2<sup>+</sup>/CDX2<sup>+</sup>) equivalent of anterior (SOX2<sup>+</sup>/OTX2<sup>+</sup>) NSCs. To this end we dissociated and  
175 replated NMP-like cells at low density at 36h, suppressed RA signalling (by removal of vitamin A from  
176 the medium and treatment with AGN) and continued Wnt/FGF treatment to minimise mesodermal  
177 commitment while halting early neural commitment (Figure 2A).

178  
179 Using immunofluorescence and RT-qPCR, we showed that these culture conditions maintain a  
180 SOX2<sup>+</sup>/CDX2<sup>+</sup> cell population between up to 10 passages, corresponding to ~30 days (Figure 2B,C and  
181 S3A, B). While *SOX2* and *CDX2* transcripts were detected, their levels varied between experiments  
182 and normally dropped between P7 and P10 (Figures 2B,C and S3A,B). Similar observations were  
183 made when using H1 hESC and AICS ZO1-mEGFP iPSCs (Figure S2C,G). After one passage (P1) the  
184 cultures were heterogeneous with some cells expressing the NMP-characteristic TBXT<sup>+</sup>/SOX2<sup>+</sup>/CDX2<sup>+</sup>  
185 signature. By P3, TBXT and its immediate downstream target TBX6 were undetectable, but most cells  
186 continued to express CDX2 and SOX2, suggesting a loss of mesodermal and a maintenance of neural  
187 potency (Figure 2B-D).

188  
189 By P5, the cell population had segregated into two types, as judged by bright-field and  
190 immunofluorescence imaging (Figure 2B and 2E): one formed compact SOX2<sup>+</sup>/CDX2<sup>+</sup> cell colonies,  
191 while the other was negative for SOX2/CDX2 and had acquired mesenchymal characteristics such as  
192 cell spreading and SNAI1 expression (Figure 2F). The SOX2<sup>+</sup>/CDX2<sup>+</sup> cells appeared to be epithelial,  
193 based on the accumulation of mEGFP-tagged zona occludens (ZO)-1 at tight junctions in transgenic  
194 AICS iPSCs (Figure 2G). Together, our results showed that persistent Wnt/FGF signalling without RA  
195 converts hPSCs via the transient NMP state into a semi-stable epithelial SOX2<sup>+</sup>/CDX2<sup>+</sup> cell colonies that  
196 could be maintained for 7-10 passages.

197  
198 **NMPs form neural progenitors and NC derivatives over time**

199 To investigate gene expression changes during the transition of NMP-like cells into epithelial and  
200 mesenchymal populations, we profiled the transcriptomes of our cultures by bulk RNA-Seq across  
201 twelve time points from 24h after seeding hESCs (time 0, t0) to P10. Analysis of principal components  
202 1 and 2 (PC1 and PC2) showed that most biological replicates (n=2-3) clustered together and PC1 (43%

203 variation) separated according to the duration between time points (Figure S4A). Some outliers were  
204 identified, which we presume to be a reflection of biological variation in our experiments. In support  
205 of this, outliers such P1.r1 and P2.r1 associated with the previous passage, such that P2.r1 clustered  
206 more closely to P1.r2 and P1.r3, suggesting that replicate 1 (r1) differentiated through the same  
207 transitions, but at a slower pace than r2 and r3.

208

209 Next, k-means hierarchical clustering was applied to all gene-specific profiles that were significantly  
210 different over at least two consecutive time points. Each of the gene clusters showed a distinct  
211 transcriptional behaviour over time (Figure 3A, Supplementary file 2). The genes of each cluster were  
212 analysed for enriched gene associated biological processes in the form of gene ontology (GO) terms  
213 and the most significant four GO terms are listed in Figure 3B (Supplementary file 3). Clusters 2 (C2)  
214 and 6 (C6) showed elevated gene expression from P1 to P8, when cells robustly expressed SOX2 and  
215 CDX2. Consistent with the role of CDX2 in regulating colinear *HOX* gene expression, *CDX2* and *HOX(1-*  
216 *9)* genes were grouped together in C2, which showed 'regionalization' as the most enriched biological  
217 process (Neijts et al., 2017, Amin et al., 2016). Conversely, *SOX2* was clustered with other neural fate  
218 determinants including *SOX21*, *SP8* and *GBX2* in C6 and thus, this cluster was linked strongly with  
219 various biological functions of neurogenesis. (Luu et al., 2011, Sandberg et al., 2005, Li et al., 2014).  
220 As expected, the most posterior HOX genes were found in C4 and C9, which showed a peak of  
221 expression around P7-P8 and P9-P10, respectively. This was in line with previous findings indicating  
222 *HOX13* genes retro-inhibit anterior *HOX* and *CDX2* transcription (Denans et al., 2015). Thus, we  
223 observed full colinear *HOX(1-13)* gene expression across ten passages (Figures 3C,D). The onset of  
224 terminal *HOX* gene expression varied in later passages, possibly reflecting slight variation in  
225 differentiation rates between experiments (Figure 3A,C, Figure S5A,B). A similar collinear HOX gene  
226 expression pattern was noted when using H1 hESC and AICS ZO1-mEGFP iPSCs (Figure S2D,H). In  
227 parallel with the onset of terminal HOX expression, C4 and C9 included genes with elevated expression  
228 at P9 and P10 (Figure 3A). These clusters were enriched for differentiated tissues such as the skeletal  
229 system (C9) and the circulatory system (C4) suggesting that cells at P7/P8 start to differentiate and  
230 this provides a genetic explanation for the decrease in cell viability and the increase in cell spreading  
231 at late passages (Figure 3A,B,E).

232

233 Similar to C4, C1 consisted of genes upregulated at P9/P10. C1 and C4 genes were enriched for cell  
234 death, cell migration and NC-related biological processes such as ossification, suggesting some loss of  
235 cell viability and the onset of cell differentiation in these later passages (Figure 3A,B). Together, these  
236 results suggest that cells become NC-like and then terminally differentiate, which would be in keeping



237 with the crest-related tissue types identified within the GO term analysis of C4 and C9. This is also  
238 consistent with the decrease in cell viability, which we observe towards passage 10. NMP-like cells  
239 appear to form neural progenitors and migratory NC cells, while adopting a more posterior identity  
240 over time.

241

### 242 **NMP-derived cells stabilise as epithelial pre-neural progenitors**

243 To determine the extent to which NMP-derived cells undergo differentiation, epithelial and  
244 mesenchymal cells were enzymatically separated at P5, profiled by bulk RNA-Seq, and compared with  
245 the original NMP-like transcriptional profiles (Figure S6A). The temporal progression from 36h to P5  
246 accounted for the majority of gene variation (PC1, ~70%) that was detected. The lineage bifurcation  
247 of NMP descendants led to the identification of 907 differentially expressed genes between epithelial  
248 and mesenchymal cells (426 genes up in epithelial and 481 genes up in mesenchymal cells; FDR <1%,  
249  $\geq 2$ -fold change, DESeq2 base mean >100 reads—supplementary file 4). Strikingly, the enrichment  
250 analysis of upregulated genes for cellular component GO terms showed that epithelial and  
251 mesenchymal cells were linked to key attributes of nerve cell differentiation (e.g. ‘synapse’ and ‘axon’)  
252 and NC cell migration (e.g. ‘extracellular matrix’ and ‘adherens junction’), respectively (Figure 4A,B,  
253 supplementary file 4). However, we did not observe expression of post-mitotic neuronal markers such  
254 as ELAV-like RNA Binding protein 3/4 (ELAVL3/4) or Tubulin-beta class III (TUBB3) suggesting cells are  
255 of an immature neuronal cell type with no synapses and axons yet (Delile et al., 2019). Molecular  
256 function GO terms for both samples were similar, and primarily reflected the large number of  
257 transcription factors expressed, but also included ‘growth factor binding’ terms which represented  
258 WNT/FGF signalling genes in addition to TGF- $\beta$  superfamily signalling genes (Supplementary file 5).  
259 Few of these genes were differentially expressed between epithelial and mesenchymal samples, and  
260 they included both positive (BMP4/5/7) and negative (GREM1 and CER1) regulators of TGF- $\beta$  signalling  
261 (Figure S6B, Supplementary file 5). Together this analysis further suggests that the epithelial cells,  
262 unlike the mesenchymal cells, are a neuronal cell type and that endogenous signalling pathways,  
263 including the TGF- $\beta$  superfamily, may influence cell identity over time.

264

265 Next, a panel of previously established NMP, PNP and neural progenitor marker genes were used to  
266 pinpoint neural progression *in vitro* (Verrier et al., 2018, Ribes et al., 2008, Olivera-Martinez et al.,  
267 2014). As expected, 36h cells were positive for NMP markers (*FGF8*, *WNT3A* and *TBXT*) and NMP/PNP  
268 (*SOX2*, *NKX1-2* and *WNT8A/C*), while the NP determinants *PAX6*, *IRX3* and *SOX1* were hardly  
269 transcribed (Figure 4C). By P5, epithelial cells had lost most NMP-exclusive expression, while the PNP  
270 markers *SOX2* and *NKX1-2* were retained (Figure 4D). *NEUROG2* and *FGFR2*, two PNT/NT markers,



271 were also active in P5 epithelial cells (Ribes et al., 2008, Olivera-Martinez et al., 2014). Furthermore,  
272 neural progenitor markers were low or absent in epithelial P5 cells (Figure 4D). Immunofluorescence  
273 for TBXT, SOX2 and PAX6 confirmed this transcriptional analysis, some of which was further validated  
274 by RT-qPCR (Figure S6C). Together, we find that epithelial colonies have a PNP identity and do not  
275 express key neural maturation genes.

276

### 277 **NMP-derived mesenchymal cells are NC**

278 We next sought to determine the identity of the mesenchymal cells. *In vitro* studies have revealed  
279 that NMPs can become trunk NC cells, a migratory mesenchymal cell population which goes on to  
280 form tissues including cartilage, bone and smooth muscle (Frith et al., 2018, Hackland et al., 2019,  
281 Leung et al., 2016). Moreover, our bulk RNA-Seq suggested that over passaging there was an increase  
282 in genes associated with cell migration and NC derivatives, concomitant with the reduction of  
283 epithelial cells and increase of differentiating mesenchymal cells in late passages (Figures 2E and  
284 3A,B). Thus, we first determined whether mesenchymal P5 cells had acquired NC-specific gene  
285 expression. Transcriptome-wide analysis showed that several NC markers genes, including *SNAI1*,  
286 *SOX9* and *SOX10*, were significantly higher in mesenchymal cells compared with their epithelial PNP  
287 counterparts (Figure 5A,B). This was corroborated by immunofluorescence of P5 tissue cultures, which  
288 showed *SNAI1*<sup>+</sup> and *SOX10*<sup>+</sup> mesenchymal cells scattered between *SOX2*<sup>+</sup>/*CDX2*<sup>+</sup> PNP colonies (Figures  
289 2B and 5C). In support of a posterior NC identity, mesenchymal P5 and P8 cells progressively expressed  
290 more posterior *HOX* genes, mirroring the PNP rostrocaudal identity (Figure 3C). By contrast, the cranial  
291 NC marker *ETS1* was only detectable in a few mesenchymal cells (Figure 5D). To determine if  
292 mesenchymal cells were capable of generating trunk NC derivatives, mesenchymal P5 cells were  
293 exposed to 1% fetal calf serum (FCS) for 7 days to convert them into NC-derived vasculature smooth  
294 muscle, containing cytoplasmic fibres of  $\alpha$ -smooth muscle actin ( $\alpha$ -SMA also known as *ACTA2*; Figure  
295 5E,F) (Mohlin et al., 2019). Together, these results show that the mesenchymal cells surrounding PNPs  
296 are functional posterior NC cells.

297

### 298 **NMP-derived trunk PNPs are stem cell-like and give rise to migratory NC**

299 The immunofluorescence analysis of fixed PNP/NC cell cultures revealed that some nuclei found  
300 within tightly clustered PNP colonies were negative for *CDX2*, but positive for *SNAI1*, suggesting that  
301 they are undergoing epithelial-to-mesenchymal transition (EMT) and becoming NC cells (Cano et al.,  
302 2000, Simoes-Costa and Bronner, 2015) (Figure 6A, 2B,E). To test this idea, PNP colonies (*CDX2*<sup>+</sup>/*SNAI1*<sup>-</sup>  
303 ) purified from NC cells using selective detachment were sub-cultured for four passages (P+1 to P+4)  
304 (Figure 6B). Immunofluorescence staining showed that, despite the low percentage of *SNAI1*<sup>+</sup> NC (8%)

305 cells in P+1 cultures, by P+4 40% of the cells were CDX2<sup>-</sup>/SNAI1<sup>+</sup> suggesting that PNP undergo EMT to  
306 generate NC cells (Figure 6B,C). To exclude the possibility that after PNP purification, the remaining  
307 NC cells repopulate the culture over passaging, single cells from the PNP or NC enriched samples were  
308 re-plated by fluorescence-activated cell sorting (FACS) into single wells (Figure S7A). No colonies arose  
309 from single NC cells, suggesting that these cells have limited proliferative capacity. By contrast, single  
310 PNPs gave rise to clonal cell lines which consisted of epithelial colonies (CDX2<sup>+</sup>/SOX2<sup>+</sup>), and  
311 surrounding NC cells (Figure 6D,E). Thus, the PNPs showed stem cell-like behaviour by undergoing self-  
312 renewal and differentiating into NC cells.

313

### 314 **Modulation of TGF- $\beta$ and SHH signalling locks in PNP rostrocaudal axis information by** 315 **preventing trunk-to-tail transition**

316 We have shown that the combined modulation of Wnt/FGF and RA signalling generated posterior  
317 PNPs. However, transcriptomics and lineage analysis indicated that PNP maintenance may be  
318 compromised by NC bifurcations, the progressive activation of more posterior HOX genes, and late-  
319 passage differentiation/cell death. In line with this, a known regulator of trunk-to-tail transition and  
320 terminal HOX induction, GDF11 was found to be significantly up-regulated in late passages compared  
321 to early passages (Figure 7A). Increased *GDF11* expression precedes activation of the terminal *HOX13*  
322 genes and coincides with the down-regulation of the stem cell marker *LIN28A*, leading to a loss in cell  
323 proliferation (Aires et al., 2019, Jurberg et al., 2013, Robinton et al., 2019)(Figure 7B,C). As such, in an  
324 attempt to prevent this progressive posteriorisation and NC commitment, we supplemented our  
325 culture medium with modulators of the TGF- $\beta$  pathway (Figure 7D). Inhibitors of Activin/Nodal  
326 (SB431542, SB) and BMP (LDN193189, LDN) signalling were used to suppress TGF- $\beta$  and NC specification  
327 (Inman et al., 2002, Cuny et al., 2008, Halder et al., 2005, Das et al., 2009, Liem et al., 1997, Stuhlmiller  
328 and Garcia-Castro, 2012). Furthermore, to mimic signals that arise from the notochord during neural  
329 tube folding/cavitation and induce a ventral identity in differentiated neuronal cultures, a  
330 smoothed agonist (SAG) was used to stimulate Sonic Hedgehog (SHH) signalling (Sasai et al., 2014,  
331 Jessell, 2000).

332

333 The combined addition of SB and LDN (+SBLDN) or SB and SAG (+SBSAG) at P3 resulted in stabilisation  
334 of PNPs for over 30 passages (90 days). At early passages (P5/P6), the addition of small molecules did  
335 not compromise the formation of CDX2<sup>+</sup>/SOX2<sup>+</sup> PNPs, which organised into typical tightly associated  
336 colonies surrounded by loosely packed SNAI1<sup>+</sup> cells. (Figure S8A,B,C). However, both supplemented  
337 conditions modestly increased the percentage of SOX2<sup>+</sup>/CDX2<sup>+</sup> cells as quantified by flow cytometry  
338 in late passages (P9/P10) (Figure S8C,D). Cells maintained in +SBSAG and +SBLDN had significantly

339 prolonged *CDX2* and *SOX2* gene expression for up to 30 passages (Figure 7E). Based on the  
340 transcriptional profiling of *HOX* genes, the positional value of the PNPs was locked at the thoracic  
341 level, considerably slowing down the upregulation of terminal *HOXC13* and *HOXA13* (Figure 7H). As  
342 expected, in comparison to P7-P10 FCHIR generated cells, *GDF11* expression was significantly lower  
343 in +SBSAG and +SBLDN cultures (Figure 7F). In line with this, *LIN28A*, which is known to be down-  
344 regulated in response to *HOX13* expression, was considerably reduced in FCHIR cultures by P7-P10  
345 (Aires et al., 2019) (Figure 7G). To test if the trunk-to-tail transition can be induced in PNPs after long-  
346 term TGF- $\beta$  inhibition, we added exogenous human recombinant GDF11 to P28-P30 cultures for 48-  
347 72h. This short term treatment of GDF11 was sufficient to induce *HOXA13* and *HOXC13* gene  
348 expression suppress *LIN28A* expression (Figure 7I,J,K).

349  
350 Notably, Verrier et al. (2018) also used dual inhibition of Nodal/Activin and BMP signals to generate  
351 RA-induced neural progenitors from NMPs. However, these cells were not maintained over long time  
352 periods presumably because of their exposure to RA. In our tissue cultures, the RA target *PAX6*  
353 remained silent in +SBLDN or +SBSAG addition at P6/7 (Figure S8E). These results therefore, show that  
354 PNPs can be locked in a thoracic identity and grown in culture for long periods of time via the addition  
355 of TGF- $\beta$  inhibitors by preventing the GDF11/*LIN28A*-mediated trunk-to-tail transition.

356

### 357 **PNPs can give rise to spinal cord neurons**

358 To establish the neuronal potential of RA-deprived PNPs, we terminally differentiated P5 FCHIR and  
359 P25 +SBSAG/+SBLDN long-term PNPs into neurons (Figure 8A). Analysis of lateral motor column (LMC;  
360 *FOXP1*), dorsal interneuron/lateral motor column marker (*LHX1*) and medial motor column markers  
361 (MMC; *LHX3*) found that all PNP conditions preferentially generated *LHX1*<sup>+</sup>/*TUJ*<sup>+</sup> cells although did not  
362 express *ISL1* (Figure 8B,D). The prescence of *LHX1*<sup>+</sup>/*ISL1*<sup>-</sup> positive neurons, suggests neurons may be  
363 lateral LMC (*LHX1*<sup>+</sup>/*ISL2*<sup>+</sup>), interneurons of the p2-dp2 domains or medial LMC which no longer express  
364 early motor neuron markers (Francius and Clotman, 2014, Zannino and Sagerström, 2015) (Figure 8B).  
365 Few cells were found to express *LHX3* indicating cells preferentially differntate MMC motor neurons  
366 (Figure 8C). Furthermore, more *CHX10*<sup>+</sup> cells were noted in +SBSAG PNP-derived cultures, suggesting  
367 SHH signalling may introduce a more ventral identity after differentiation giving rise to V2a  
368 interneurons (*CHX10*<sup>+</sup>/*TUJ*<sup>+</sup>) although sustained SHH signalling throughout early differentiation should  
369 increase the yield of ventralised neurons (Figure S9A) (Thaler et al., 2002, Clovis et al., 2016, Le Dréau  
370 and Martí, 2012). Together, these results show that our PNPs can generate various spinal cord  
371 derivatives demonstrating neuronal potential.

372

## 373 DISCUSSION

374 The NMP niche is maintained by Wnt/FGF-mediated autoregulatory loops, CYP26A1-mediated RA  
375 signal suppression, and active RAR $\gamma$ -mediated transcriptional repression (Janesick et al., 2014, Koide  
376 et al., 2001, Sakai et al., 2001, Yamaguchi et al., 1999, Deng et al., 1994, Cunningham et al., 2015,  
377 Takemoto et al., 2006, Martin and Kimelman, 2008, Takada et al., 1994, Liu et al., 1999, Abu-Abed et  
378 al., 2001, Martin and Kimelman, 2010). By simultaneously controlling these multiple signalling  
379 pathways *in vitro*, we have generated regionalised spinal cord progenitors and NC cells from hPSCs.  
380 Our protocol consistently yields a well-defined population of spinal cord PNPs and NC cells different  
381 rostrocaudal identities, providing a valuable source of spinal cord cells and NC which hold the potential  
382 for drug screening, detailed disease modelling, or therapeutic applications. Moreover, our model  
383 provides a robust platform to study cellular commitments and transitions within the developing  
384 human spinal cord at greater detail. In the long term, we hope that use of our protocol will improve  
385 the understanding of selective neuronal vulnerability, a recognised, yet poorly understood feature of  
386 neurodegenerative disease and spinal cord injury. More recently, Wind et al., (2020) similarly showed  
387 that prolonged FGF/Wnt signalling can generate spinal cord neural progenitor populations capable  
388 integrate with into the chick neural tube, suggesting their potential of the cells for disease modelling  
389 and regenerative therapy.

390

391 Since Gouti et al., (2014) showed that trunk neuronal derivatives can be generated from mouse  
392 NMP-derived cells, various protocols have emerged for generating spinal cord progenitors from  
393 hPSCs. However, these often do not produce progenitors which undergo complete  
394 rostrocaudal diversification and therefore do not fully mimic *in vivo* development. Furthermore,  
395 previous studies showed that *in vitro* generated NMP-like cells, when passaged back into FGF/  
396 CHIR or CHIR alone, commit to a mesodermal lineage (Gouti et al., 2014, Turner et al., 2014). In  
397 contrast, we observed a gradual decrease in TBXT and TBX6 expression, and commitment of  
398 NMP-like cells to a neural trajectory. Interestingly, this commitment appeared to occur  
399 independently of RA signalling. More recently, Edri *et al.*, (2019) found NMP-like cells derived  
400 rather than ESCs, resemble more accurately their counterparts *in vivo* and have a similar progressive  
401 commitment to a neural fate after passaging (Edri et al., 2019). This is in line with our observations  
402 using hPSCs, and could reflect that hPSCs correspond more closely to the primed pluripotency state  
403 of mouse EpiSCs (Nichols and Smith, 2011, Brons et al., 2007). Compared to previous studies of *in*  
404 *vitro*-derived NMPs, the PNPs reported here are a more stable source of spinal cord as their  
405 maintenance does not depend on the delicate balance between TBXT and SOX2, and they do not

406 express critical RA-responsive neurogenic genes like PAX6 and SOX1, which would promote their fate  
407 progression to spinal cord neurons (Gentsch et al., 2017, Janesick et al., 2015).

408 While PNPs were efficiently derived from NMPs, their long-term maintenance was accompanied by  
409 progressive posteriorisation and NC delamination. Thus, to promote PNP self-renewal, we tried to  
410 mimic the niche environment of axial stem cells by inhibiting TGF- $\beta$  and stimulating SHH signalling.  
411 Furthermore, TGF- $\beta$  superfamily signalling members GDF11/GDF8 are known to promote trunk-to-tail  
412 transition, resulting in the up-regulation of HOX13 genes and the loss of LIN28A, a key factor, for the  
413 proliferation of tail bud progenitors (Aires et al., 2019). TGF- $\beta$  signal inhibition favoured PNP fate over  
414 time and locked PNPs in a thoracic HOX identity for up to 30 passages, highlighting the importance of  
415 TGF- $\beta$  signal inhibition in maintaining trunk PNPs. Previous *in vivo* data supports this observation, as  
416 the inhibitory TGF- $\beta$  signal transducer *SMAD6*, is specifically expressed in the PNT, while the Activin-  
417 neutraliser Follistatin (FST) is required for dorsal-ventral patterning and neuronal fate specification in  
418 response to SHH signalling (Olivera-Martinez et al., 2014, Liem et al., 2000). Specifically, our data  
419 indicates that ALK4, ALK5 and ALK7 inhibition by SB431542 is acting to prevent GDF11 signalling and  
420 is sufficient to promote PNP identity and viability in our culture by maintaining LIN28A expression  
421 (Andersson et al., 2006). This is in line with recent *in vivo* evidence describing the involvement of  
422 TGFBR1/GDF11 in secondary neurulation (Dias et al., 2020, Aires et al., 2019).

423 Our work also established that PNPs undergo EMT to form NC cells with corresponding rostrocaudal  
424 identity. Recent studies have shown that cranial NC is specified at the neural plate border and trunk  
425 NC arises from the NMP niche in a BMP dependent manner (Frith et al., 2018, Wymeersch et al., 2016,  
426 Stuhlmiller and Garcia-Castro, 2012). Surprisingly, the addition of the BMP inhibitor (LDN) did not  
427 prevent NC specification in long-term PNPs. BMP-mediated inhibition of NC was possibly GDF11  
428 inhibition, which in mouse was found to lead to an increase in SOX10, suggesting an increased  
429 specification of NC specification in the tail (Aires et al., 2019). As a result, it is unclear why BMP  
430 inhibition does not prevent NC specification but we hypothesise that incomplete BMP signalling  
431 inhibition is the most likely candidate driving NC specification in this setting, with only an intermediate  
432 level of BMP signalling required to induce NC commitment (Frith et al., 2018, Hackland et al., 2017).  
433 Further work to test this hypothesised is required. Furthermore, we did not observe any direct NC  
434 specification from NMPs indicating NC specification *in vivo* may occur at the PNT. However, it remains  
435 a possibility that NC can be specified from NMPs and PNPs, and will be interesting to explore further.

436

437 In conclusion, we show with sustained Wnt/FGF signalling PNPs undergo collinear HOX gene  
438 expression and the transition to a pre-neural fate (Mouilleau et al., 2020, Edri et al., 2019, Wind et al.,

439 2020). RA inhibition prevents the upregulation of RA-responsive neural determinants genes such as  
440 PAX6 and maintains expression of genes associated with a PNP identity. We further suggest, based on  
441 previous studies and the generation of spinal cord neurons, that removal of FGF/Wnt signalling and  
442 addition of RA signalling permits differentiation to neural progenitors and an upregulation of  
443 neurogenic genes (Figure 9) (Verrier et al., 2018, Diez del Corral et al., 2002, Diez del Corral et al.,  
444 2003, Wind et al., 2020). Furthermore, single PNPs undergo ‘self-renewal’ due to high *LIN28A* and  
445 low *HOX13* expression until PNPs undergo trunk-to-tail transition as a result of increased GDF11  
446 signalling. The addition of TGF- $\beta$  inhibition combined with BMP inhibition or SHH agonism (+SBLDN/  
447 +SBSAG) prevents GDF11 upregulation and subsequent loss of *LIN28A*, resulting in stabilisation of  
448 PNPs in a thoracic identity for up to 30 passages. Finally, PNPs give rise to NC as they progress  
449 through a rostro to caudal identity, the first protocol to our knowledge to generate NC *in vitro* with  
450 diverse rostrocaudal identity.

451

## 452 **ACKNOWLEDGEMENTS**

453 We thank members of the following scientific platforms and units of the Francis Crick Institute for  
454 their expertise, support and use of the facilities: advanced sequencing facility, advanced light  
455 microscopy facility, the human embryo and stem cell unit, bioinformatics and biostatistics and  
456 research illustration and graphics. We also thank Rickie Patani, Jamie Mitchell, James Briscoe, Vicki  
457 Metzi, Teresa Rayon, Alessia Caramello, Robin Lovell-Badge, Siew-Lan Ang and Francois Guillemot for  
458 advice, help and reagents; Rebecca Jones and Clara Collart for critical reading of the manuscript; and  
459 the Smith lab for discussions and advice.

460

## 461 **CONTRIBUTIONS**

462 FC: Conceptualization, Validation, Methodology, Investigation, Formal analysis, Writing—original  
463 draft preparation, Supervision, Project administration

464 GEG: Conceptualization, Methodology, Investigation, Supervision, Project administration, Writing—  
465 review & editing

466 RM: Software, Methodology, Formal analysis, Writing—review & editing

467 CB: Investigation, Writing—review & editing

468 LH: Methodology, Investigation, Resources, Writing—review & editing

469 AHR: Investigation

470 JCS: Conceptualization, Writing—review & editing, Supervision, Funding acquisition

471 ASB: Conceptualization, Methodology, Investigation, Writing—review & editing, Supervision, Project  
472 administration, Funding acquisition

473



474 **COMPETING INTERESTS**

475 The authors have no competing interests to declare

476

477 **METHODS**

478 **Human pluripotent stem cell culture**

479 Human ESCs (WA09 and WA01, WiCell) and human iPSCs (AICS-23, Allen Institute) were maintained in  
480 feeder-free cultures, plated on Corning Matrigel Growth Factor Reduced (GFR) Basement Membrane  
481 Matrix (Corning Incorporated, 354230) and grown in mTESR1 (STEMCELL technologies, 85850). Cells were  
482 passaged as aggregates at a ratio of 1:10/15 using Gibco Versene Solution (Thermo Fisher Scientific,  
483 15040066). All experiments were completed within 15 passages after recovery from cryopreservation and  
484 screened for mycoplasma monthly. Prior to cryopreservation, hPSCs were assessed for genetic stability by  
485 KaryoStat and indicators of pluripotency were assessed by PluriTest (Thermo Fisher Scientific). hPSCs were  
486 subject to routine pluripotency using BD Stemflow Human and Mouse Pluripotent Stem Cell Analysis Kit  
487 (BD Biosciences, 560477) as recommended by the manufacturers, or by immunostaining against OCT3/4,  
488 SOX2 and NANOG (see Table S5 for antibody details) using the standard immunostaining protocol below.  
489 All experiments with hESCs were approved by the UK Stem Cell Bank steering committee (SCSC13-03).

490

491 **NMP differentiation**

492 For differentiation into NMPs, confluent hPSCs were dissociated into single cells using Gibco TrypLE Express  
493 (Thermo Fisher Scientific, 12604013) and plated at a density of 50,000 cells/cm<sup>2</sup> on Matrigel hESC-  
494 Qualified Matrix (Corning Incorporated, 354277). Cells were plated in mTESR1 supplemented with 10 μM  
495 Y-27632 (Tocris, 1254) for a 24h to 36h to allow recovery before starting differentiation into NMPs.  
496 Following recovery time, cells were grown in Dulbecco's Modified Eagle Medium/Nutrient Mixture F-12  
497 (DMEM/F-12, Thermo Fisher Scientific, 10565018) supplemented with 1x Gibco B-27 supplement minus  
498 vitamin A (Thermo Fisher Scientific, 12587010) and 1x Gibco N2 (Thermo Fisher Scientific, 17502048), 4-6  
499 μM CHIR-99021 (Selleck Chem, S2924-SEL-5mg), 10 μM AGN193109 sodium salt (Santa Cruz, sc-210768)  
500 and 20 ng/ml FGF2 (R&D systems, 233-FB-025) referred to from now on as NMP differentiation medium.  
501 NMP differentiation medium was supplemented with and 5 μM Y-27632 (Tocris).

502

503 **PNP long term culture**

504 To generate PNPs, NMPs were passaged at 36h using TrypLE express (Thermo Fisher Scientific) and when  
505 confluent thereafter. Cells were passaged as single cells at a ratio of 1:6 into NMP differentiation medium,  
506 supplemented with 10 μM Y-27632 (Tocris). During passage 1 to 3 progenitors were found to detach from  
507 the dish forming spheres. If this occurred, spheres were dissociated into single cells and re-plated  
508 immediately. PNP generation was more successful if cells did not detach, therefore, to prevent cells



509 detaching during this period cells were passaged before reaching high confluency. In addition, cells were  
510 only removed from the 37°C incubator when ready to passage, as the temperature fluctuations promoted  
511 detachment. From passage 3 cells were grown NMP differentiation medium supplemented with 5 µM Y-  
512 27632 (Tocris). Human iPSCs were found to detach more readily than hESCs. PNPs could be maintained, for  
513 8 to 12 passages using standard conditions as above, passaging every 3-4 days when 80-90% confluent. To  
514 lock A-P axis progression, 2 µM SB431542 (CELL guidance systems, SM33-10) and 100 nM LDN193189  
515 (Sigma-Aldrich, SML0559-5MG) or SB431542 (CELL guidance systems, SM33-10) and 500 nM smoothed  
516 agonist (SAG, Sigma-Aldrich, 566660-1mg) were added to NMP differentiation medium at passage 3. For  
517 selective detachment, 90% confluent PNPs were washed with PBS and treated with TrypLE express  
518 (Thermo Fisher Scientific) at 37°C for 3-5 mins. When mesenchymal cells started to detach, cells were  
519 gently removed by tilting the plate side-to-side. TrypLE containing the detached mesenchymal cells was  
520 carefully removed. Remaining epithelial cells were washed off the vessel using basal medium.

521

## 522 **Neuronal differentiation**

523 To generate neurons, we used a modified protocol based on a previously published neural  
524 differentiation protocol (Lippmann et al., 2015). 80-90% confluent PNP/NC cultures were dissociated  
525 to single cells and plated at 33,000 cells/cm<sup>2</sup> onto Matrigel hESC-Qualified matrix (Corning) into the  
526 applicable former culture medium (NMP differentiation medium plus or minus SBLDN or SBSAG). 24h  
527 after plating, medium was replaced with neural differentiation medium consisting of Gibco neural  
528 basal medium (Thermo Fisher Scientific, 21103049) supplemented with Gibco 1x B27 supplement  
529 (Thermo Fisher Scientific, 17504044) and 1x N2 (Thermo Fisher Scientific), 2 µM DAPT (Chem Cruz, sc-  
530 201315) and 1 µM retinoic acid (RA, Sigma Aldrich, sc-210768) for 48h. Following 48h treatment,  
531 media was replaced with 10 ng/ml brain-derived neurotrophic factor (BDNF, PeproTech, 450-02-2UG),  
532 10 ng/ml glial-derived neurotrophic factor (GDNF, PeproTech, 450-10-2UG), 1 µM retinoic acid (RA,  
533 Sigma Aldrich, sc-210768), 1 µM cAMP (Sigma Aldrich, A6885-100mg) and 200 µM L-ascorbic acid  
534 (Sigma Aldrich, A8960) for 10 days. At day 12 cells were dissociated using TrypLE express and replated  
535 as single cells onto fresh Matrigel hESC-Qualified matrix (Corning) plates into neural differentiation  
536 medium (as above) supplemented with 20 µM DAPT (Chem Cruz, sc-201315), 10 ng/ml brain-derived  
537 neurotrophic factor (BDNF, PeproTech, 450-02-2UG), 10 ng/ml glial-derived neurotrophic factor  
538 (GDNF, PeproTech, 450-10-2UG), 1 µM cAMP (Sigma Aldrich, A6885-100mg) and 200 µM L-ascorbic  
539 acid (Sigma Aldrich, A8960). Medium was supplemented with 10 µM Y-27632 (Tocris) for the first 24h.  
540 During neural induction and maintenance, growth medium was replaced every 48h until day 24.

541

542

543

544 **Neural crest differentiation**

545 To differentiate NC cells, 80-90 % confluent PNP/NC cultures at P5 were dissociated to single cells and  
546 plated at 1:10 onto Matrigel hESC-Qualified matrix (Corning) into DMEM:F12 (Thermo Fisher  
547 Scientific) supplemented with 1x B27 supplement (Thermo Fisher Scientific) and 1 % Fetal Bovine  
548 Serum (FBS, Sigma Aldrich, F754) (Mohlin et al., 2019). Medium was replenished every 48h for 7 days.  
549

550 **Trunk-to-tail transition**

551 PNPs were generated and maintained as described above for PNP long term maintenance. Cultures  
552 between P25 and P30 were split into long-term PNP maintenance medium (+SBSAG/+SBLDN), NMP  
553 differentiation medium (-SBSAG/-SBLDN) or NMP differentiation medium supplemented with 50  
554 ng/ml GDF11 (Peprotech, 120-11-B). Samples were collected for RNA analysis when confluent (48-  
555 72h).

556

557 **Immunofluorescence microscopy**

558 Cells were cultured in 8 or 12 well  $\mu$ -slides (Ibidi) and fixed by adding ice-cold 4% Pierce formaldehyde  
559 (w/v) methanol-free (Thermo Fisher Scientific, 28908) in PBS for 10-15 mins. Cells were permeabilised  
560 in PBS supplemented with 0.1 % (v/v) Triton-X100 (Sigma Aldrich, T8787-250ML) for 10 mins and then  
561 blocked solution consisting of PBS supplemented with 0.1 % (v/v) Triton-X100 (Sigma Aldrich), 5% (v/v)  
562 Donkey serum (Merck Millipore, S30-100ML) for more than 1h at room temperature. Primary  
563 antibodies were incubated in blocking solution at 4°C overnight in concentrations detailed in  
564 Supplementary file 6. Cells were then washed in PBS and incubated in Donkey AlexaFluor conjugated  
565 secondary antibodies (Abcam) diluted at 1:400 in blocking solution for more than 1 hour at room  
566 temperature. Cells were mounted in Vectorshield antifade mounting medium containing DAPI (Vector  
567 Laboratories, H-1200-10). Cells were imaged using two imaging systems; 1) by a Zeiss LSM710 confocal  
568 microscope (Carl Zeiss AG) using Zeiss Plan-Apochromat 20x/0.8 or 10x/0.45 objective (Carl Zeiss AG)  
569 controlled by ZEN Black 2012 software (Carl Zeiss AG); and 2) by an inverted Olympus IX83 microscope  
570 (Olympus Corporation) using an Olympus super-apochromatic 20x/0.75 objective (Olympus  
571 Corporation), captured using a Hamamatsu Flash 4.0 sCMOS camera (Hamamatsu photonics), a  
572 Spectra X(LED) light-source (Lumencore) and controlled by CellSens Dimension software (Olympus  
573 Corporation)). Post-acquisition analysis was performed using (Fiji) Image J (Schindelin et al., 2012).  
574 Briefly, nuclear segmentation was achieved using a fixed binary threshold using DAPI, the fluorescence  
575 intensity (mean grey value) of each channel was masked back to nuclei.

576

577

## 578 **Flow Cytometry**

579 Cells were collected using Gibco TrypLE express (Thermo Fisher Scientific) dissociation, fixed by adding  
580 ice-cold 4% Pierce formaldehyde (w/v) methanol-free (Thermo Fisher Scientific) in PBS for 15 mins,  
581 and washed using PBS. Cells were permeabilised with PBS/0.5 % Triton-X100 for 15m and blocked with  
582 PBS supplemented with 0.1 % (v/v) Triton-X100 (Sigma Aldrich), 1 % BSA fraction V (w/v) (Sigma-  
583 Aldrich, A3059) for 1hr while mixing on a slow speed gyratory motion shaker. Primary incubations  
584 were completed in blocking buffer using Alexa Fluor 488 Mouse anti-SOX2 (BD Pharmingen, O30-678)  
585 and Alexa Fluor® 647 Mouse anti-CDX-2 (BD Pharmingen, M39-711,). After washes, fluorescence was  
586 immediately measured on a LSR II cytometer (BD Biosciences) and results were analysed using FlowJo  
587 software (FlowJo LLC). Gates used to determine percentage of positive cells were designed based on  
588 fluorescence levels detected in the control samples, which included both Alexa Fluor 488 Mouse IgG1  
589  $\kappa$  (MOPC-21, BD Pharmingen and Alexa Fluor 647 Mouse IgG1  $\kappa$  (BD Pharmingen, MOPC-31C) isotype  
590 control isotype and unstained sample. Aldehyde dehydrogenase activity was measured as per the  
591 manufacturer's guidelines using the ALDEFLUOR Kit (STEMCELL Technologies, 01700). Fluorescence  
592 was measured on a LSR II cytometer (BD Biosciences) and analysed using FlowJo software (FlowJo  
593 LLC).

594

## 595 **Clonal expansion of PNPs and NC cells**

596 To generate sub-clonal PNP and NC cell lines, passage 5 cells were selectively detached and dissociated  
597 into single cells using TrypLE express (Thermo Fisher Scientific) as previously described. Cells were  
598 resuspended into RPMI 1640 (Thermo Fisher Scientific, 32404-014) supplemented with 10% (v/v)  
599 KnockOut serum replacement, (KSR, Thermo Fisher Scientific, 10828028) and 10  $\mu$ M Y-27632 (Tocris).  
600 Cells were sorted using a MoFlo XPD (Beckman Coulter) using FSC and SSC profile to select single, live  
601 cells. Cells were sorted into Matrigel hESC-Qualified Matrix (Corning) coated 96 well plates (Corning)  
602 containing NMP differentiation medium. Surviving cells were subsequently passaged TrypLE express  
603 (Thermo Fisher Scientific) to expand clonal population as previously described above.

604

## 605 **RNA extraction, cDNA synthesis and qPCR**

606 Total RNA extraction was completed using RNEasy mini kit (Qiagen, 74106) following the  
607 manufacturer's instructions. cDNA was synthesised using Maxima First Strand cDNA Synthesis Kit for  
608 RT-qPCR with dsDNase (Thermo Fisher Scientific, K1672) following manufacturer's instructions with  
609 the addition of a dilution step where cDNA was diluted 1:60 in water. qPCR analysis was performed  
610 using primers detailed in Supplementary file 7 on a Roche Lightcycler 480 II (Roche Holding AG) using  
611 LightCycler 480 SYBR Green I Master mix (Roche Holding AG, 04887352001). Relative expression was

612 calculated using the  $\Delta\Delta C_t$  method, normalising each gene to porphobilinogen deaminase (PBGD)  
613 levels.

614

#### 615 **RNA-sequencing**

616 RNA was extracted using RNEasy mini kit (Qiagen) following the manufacturer's instructions including  
617 recommended DNase digestion step. RNA concentration was measured on a on a GloMax (Promega  
618 Corporation) and RNA integrity on TapeStation (Agilent Technologies). Libraries were prepared using  
619 KAPA mRNA (PolyA) HyperPrep Kit (Roche Holding AG, KK8581) using 500 ng RNA per sample  
620 according to manufacturer's instructions. Libraries were sequenced using a HiSeq 4000 (Illumina  
621 Biotechnology) as follows: pooled to 4 nM, 75bp single end sequencing and up to 38 million reads per  
622 sample. Data is available at the GEO repository (accession number GSE150709).

623

#### 624 **RNA-seq analysis**

625 Reads were Illumina adapter trimmed using Cutadapt v1.16 (Martin, 2011) and aligned against  
626 GRCh38 and Ensembl release 86 transcript annotations using STAR v2.5.2b (Dobin et al., 2013) via the  
627 transcript quantification software RSEM v1.3.0 (Li and Dewey, 2011). Gene-level counts were rounded  
628 to integers and subsequently used for differential expression analysis with DESeq2 (Love et al., 2014).  
629 Differential expression analysis between pairwise replicate groups was thresholded for significance  
630 based on an  $FDR \leq 0.01$ , a fold-change of  $\pm 2$ , and a base-mean expression of  $\geq 100$ . PCA analysis  
631 was conducted on the normalised log transformed count data using the 10% most variable genes  
632 across samples. The volcano plot depicts the FDR and logFC statistics from the group DESeq2  
633 differential expression analysis between P5 epithelial and P5 mesenchymal samples. For hierarchical  
634 clustering analysis, genes that maintained their significance and direction of change across 2  
635 consecutive time-points were selected for visualisation in a heatmap. K-means clustering ( $k=10$ ) was  
636 used to identify distinct gene clusters of related expression. Heatmaps show gene-level normalised  
637 counts, centred and scaled as z-scores. Gene ontology analysis was carried out using ToppGene Suite  
638 (ToppFun function) (Chen et al., 2009).

639

#### 640 **Comparison between data sets**

641 Previously published Affymetrix array data were downloaded from the NCBI Gene Expression  
642 Omnibus (GEO) as GSE109267 (Frith et al., 2018). Cell files were imported into R and RMA processed  
643 using the Bioconductor package oligo with default settings. Differential expression analysis between  
644 NMP and hESC replicate groups was assessed using limma (Ritchie et al., 2015). Genes with an FDR  
645 corrected p-value  $\leq 0.01$  and fold change  $\geq \pm 2$  were called significant. NMP high genes from the

646 Verrier et al (2018) study were provided in supplementary data and subsequently filtered using a P-  
647 value of  $\leq 0.01$  (Verrier et al., 2018). The overlap between each genes list representing significantly  
648 upregulated genes at 36h was generated using BioVenn (Hulsen et al., 2008). The overlap between  
649 each gene list was found to be significant ( $p < 1e-4$ , hypergeometric distribution).

650

651

652

653

654

655

656

657

658

659

660

661

662

663

664

665

666

667

668

669

670

671

672

673

674

675

676

677

678 **FIGURES**

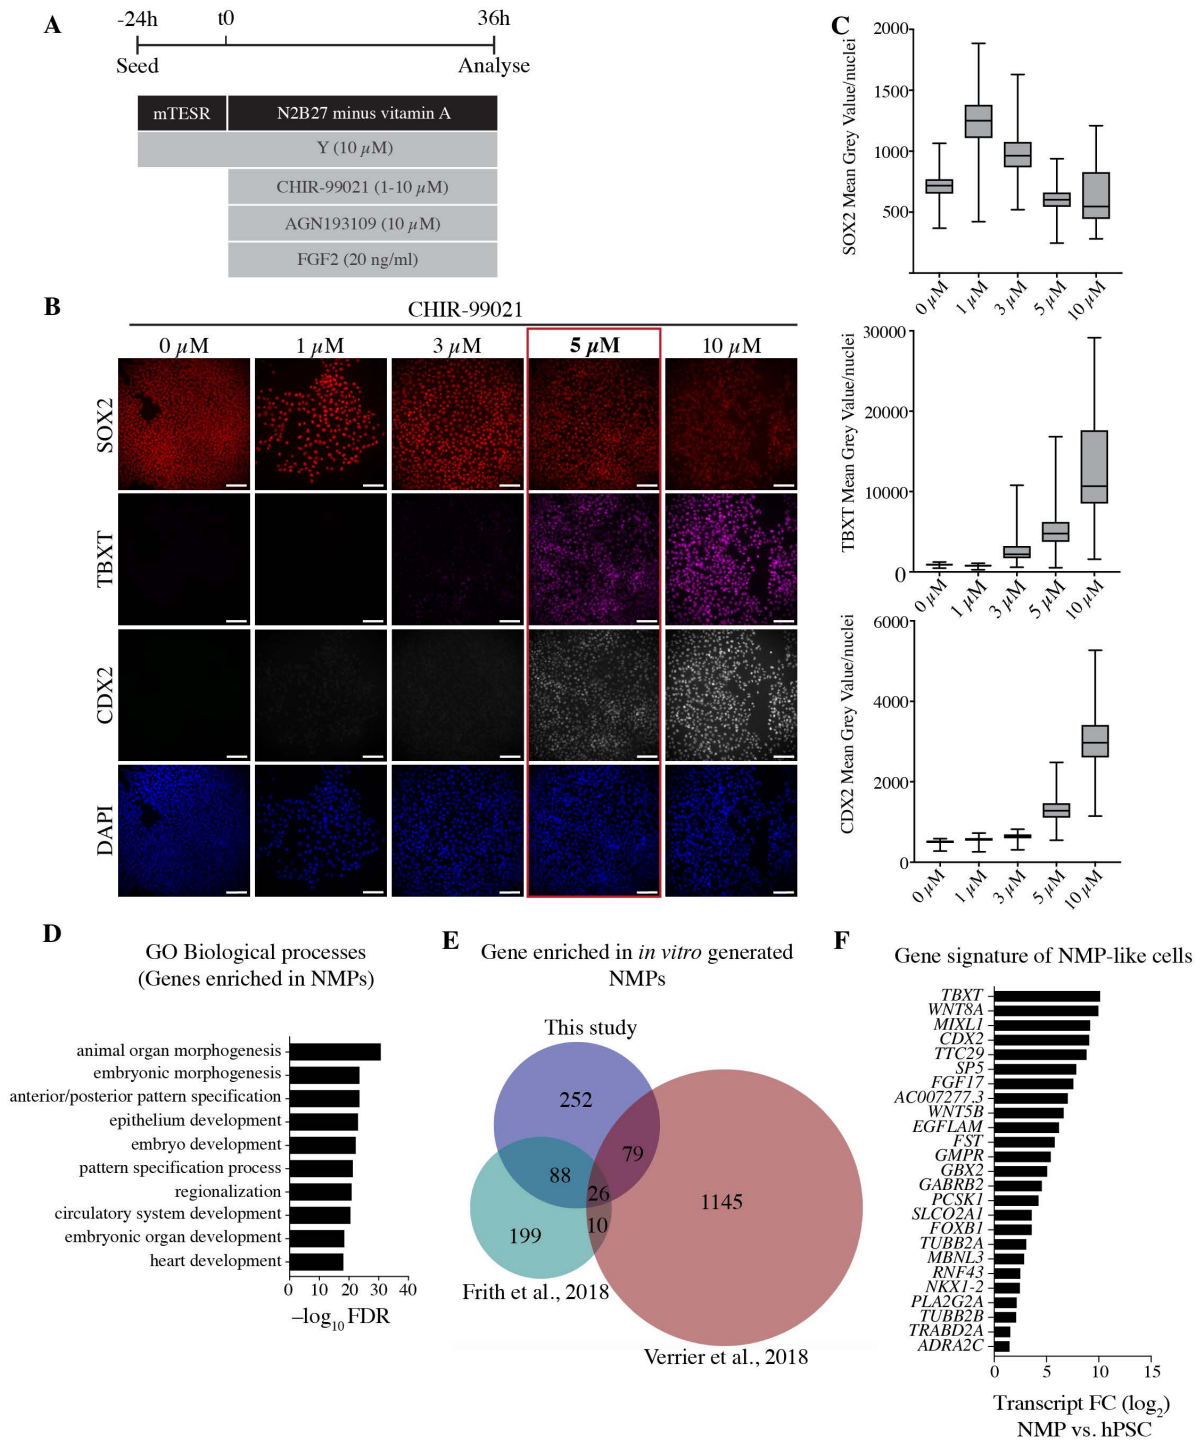

679

680 **Figure 1: NMP-like cells are induced by intermediate Wnt signalling in the presence of FGF and**  
 681 **inhibited RA signalling.**

682 A) Tissue culture scheme for optimising NMP generation from hPSCs. hPSCs are plated 24h before  
 683 exposure to FGF2 (20ng/ml), CHIR-99021 (0-10  $\mu$ M), AGN193109 (10  $\mu$ M) and Y-27632 (10  $\mu$ M) for  
 684 36h. B) Representative immunostaining of 36h cultures treated as shown in (A), showing characteristic

685 NMP markers SOX2 (red), TBXT (magenta), CDX2 (grey) and the nuclear stain DAPI (blue) under  
686 different CHIR-99021 concentrations. Scale bars, 100  $\mu$ m. C) Box-plots showing mean grey  
687 value/nuclei quantified from repeat experiments as shown in (B). Each plot show data points collected  
688 from 2-4 experiments (>200 nuclei). D) Biological process GO analysis for genes significantly  
689 upregulated in NMPs compared to pluripotent hESCs. The top 10 biological process terms with the  
690 corresponding Benjamini and Hochberg adjusted p-values (FDR) are shown. E) Venn diagram showing  
691 the overlap of significantly upregulated genes in NMPs as reported in this study, Frith et al., (2018)  
692 and Verrier et al., (2018). F) Graph showing transcriptional fold change (FC) within the dataset of this  
693 study, of 26 genes commonly upregulated in NMPs according to Venn diagram in (E).



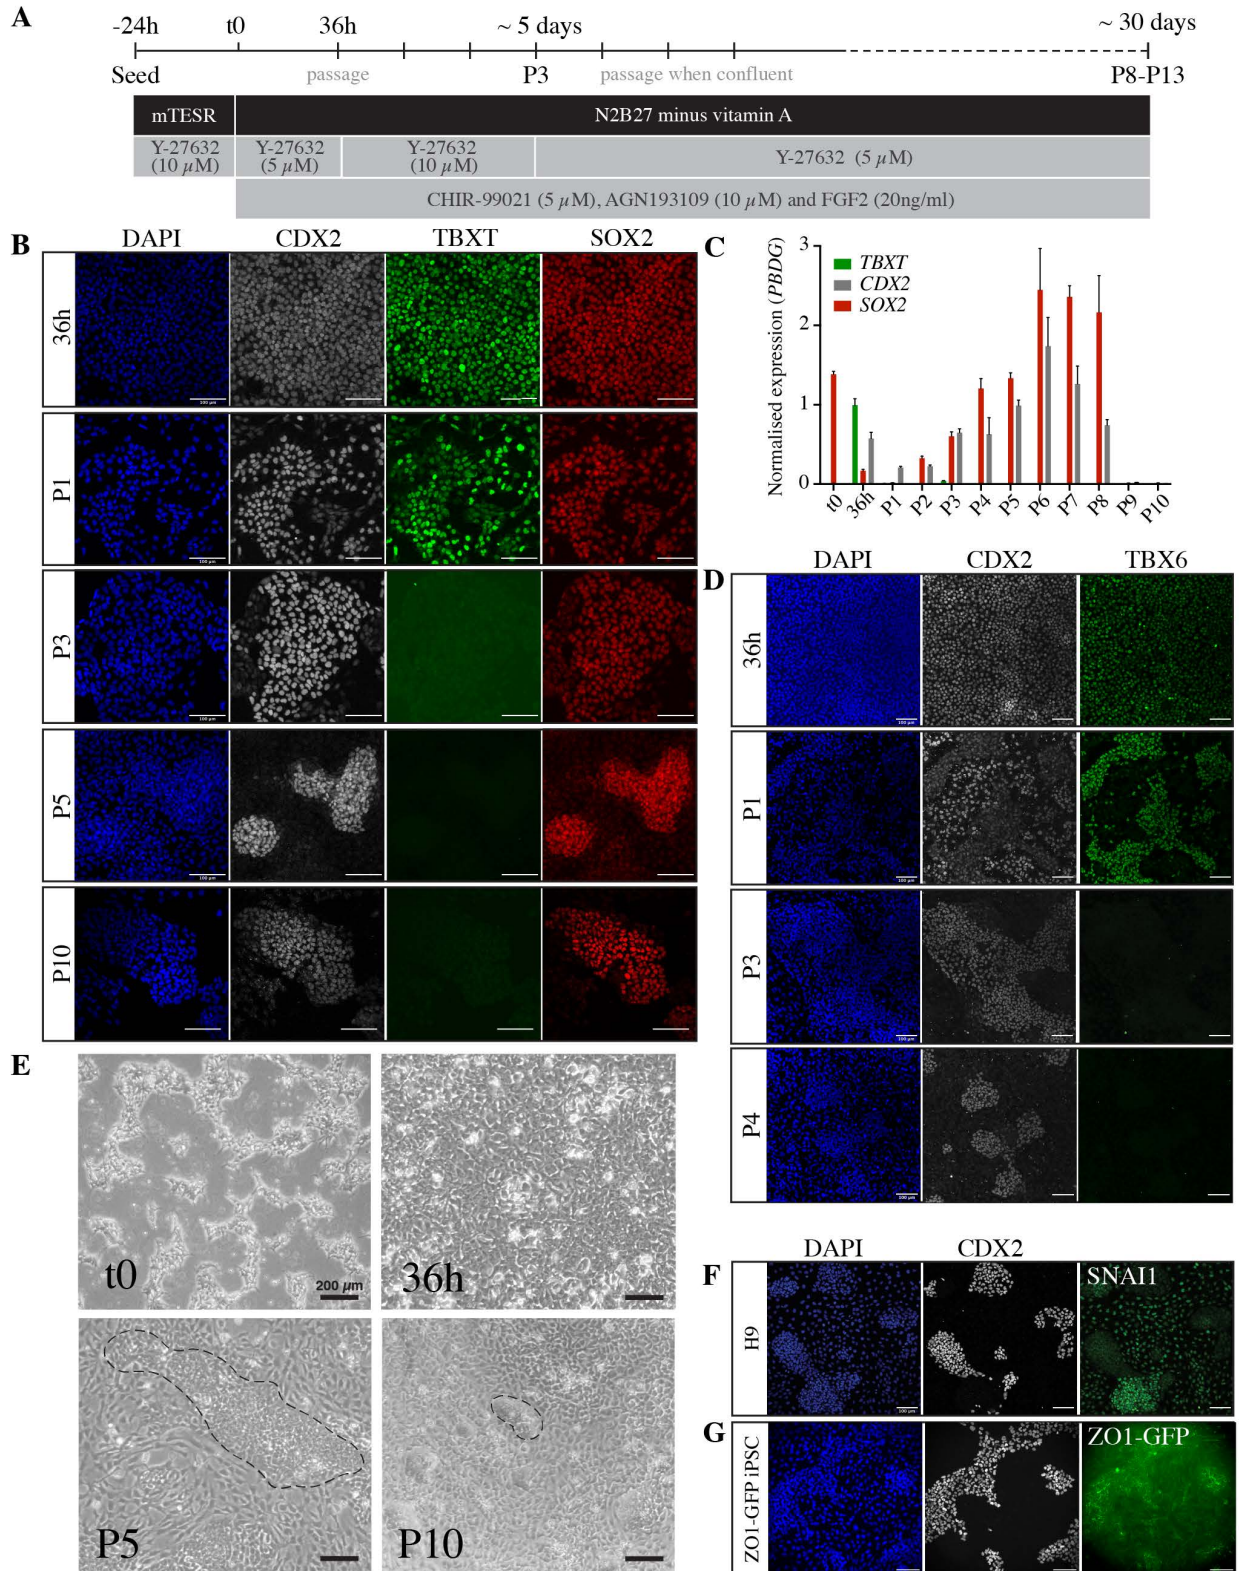

694

695 **Figure 2: Long term culture of NMPs in the presence of Wnt/FGF and inhibited RA signalling**  
 696 **generates epithelial SOX2<sup>+</sup>/CDX2<sup>+</sup> cell colonies.**

697 A) Tissue culture scheme for generating NMPs and maintaining neural progenitors *in vitro*. Cells are  
 698 passaged at 36h and subsequently passaged at 80-90% confluency for up to 13 passages in FGF2

699 (20ng/ml), CHIR-99021 (5  $\mu$ M), AGN193109 (10  $\mu$ M) and Y-27632 (10 or 5  $\mu$ M). B) Representative  
700 immunostaining of CDX2 (grey), TBXT (magenta), SOX2 (red) and nuclear stain DAPI (blue) at increasing  
701 stages of tissue culture (36h, passage (P)1, P3, P5 and P10). Scale bars, 100  $\mu$ m. C) Transcriptional  
702 analysis (RT-qPCR) of NMP markers at each passage up to passage 10. Expression levels are normalised  
703 to the reference gene *PBDG*. Error bars show SD, (n=3 technical replicates). Data are *representative of*  
704 three independent *experiments*, biological replicates provided in Figure S3A,B. D) Representative  
705 immunostaining of TBX6 (green), CDX2 (grey) and nuclear stain DAPI (blue) at 36h, P1 and P3. Scale  
706 bar, 100  $\mu$ m. E) Representative brightfield images of cells at the indicated stages. Dashed lines in P5  
707 and P10 outline examples of a compact epithelial colonies, which are surrounded by flat mesenchymal  
708 cells. Scale bar, 200  $\mu$ m. F) Representative immunostaining of CDX2 (grey), SNAI1 (green) and the  
709 nuclear stain DAPI (blue) at passage 5. Scale bar, 100  $\mu$ m. G) Representative immunostaining of CDX2  
710 (grey), GFP (ZO1-mEGFP iPSC, green) and the nuclear stain DAPI (blue) at passage 5. Scale bar, 100  
711  $\mu$ m.

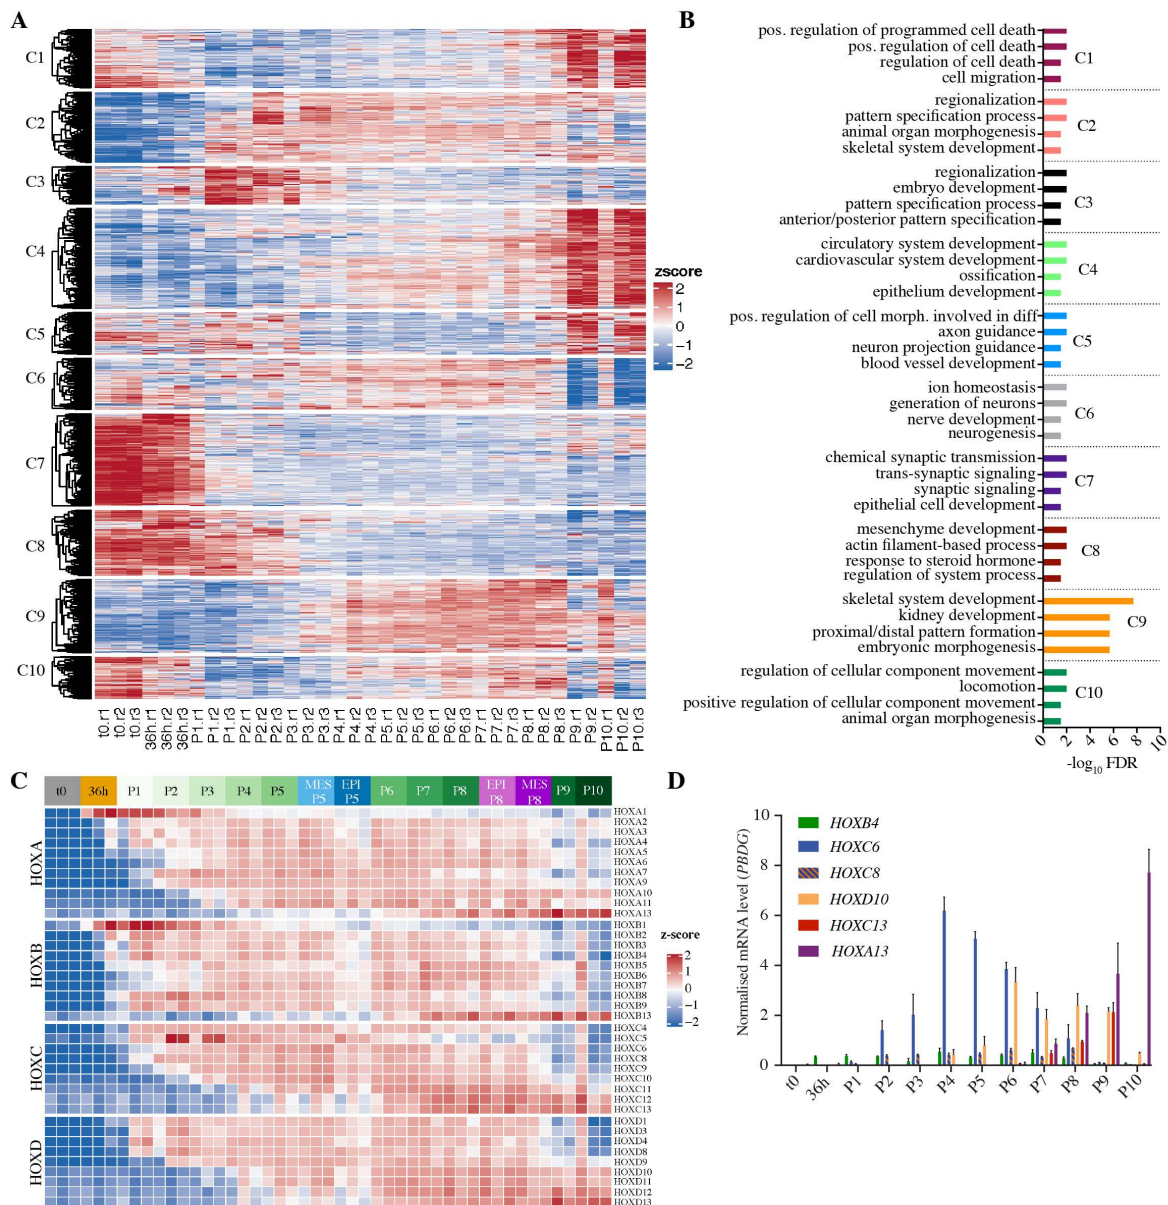

712

713 **Figure 3: RNA-Seq analysis indicates NMPs transition to neural progenitors and NC derivatives.**

714 A) Heatmap showing dynamically expressed genes (z-score) sorted into 10 clusters (C1-10) using k-

715 means hierarchical clustering. Each cluster represents a different temporal expression pattern. B)

716 Biological processes GO analysis for gene sets in each cluster shown in (A). The corresponding

717 Benjamini and Hochberg adjusted p-values (FDR) are shown. C) Heatmap of expressed *HOX(A-D)*

718 genes (z-score) across each time point including enriched epithelial (EPI) and mesenchymal (MES)

719 samples at P5 and P8. D) Transcript levels of selected *HOX* genes as measured by RT-qPCR. Expression

720 level was normalised to the reference gene *PBGD*. Error bars show SD, (n=3 technical replicates). Data

721 are representative of three independent experiments, replicates provided in Figure S5A,B.

722



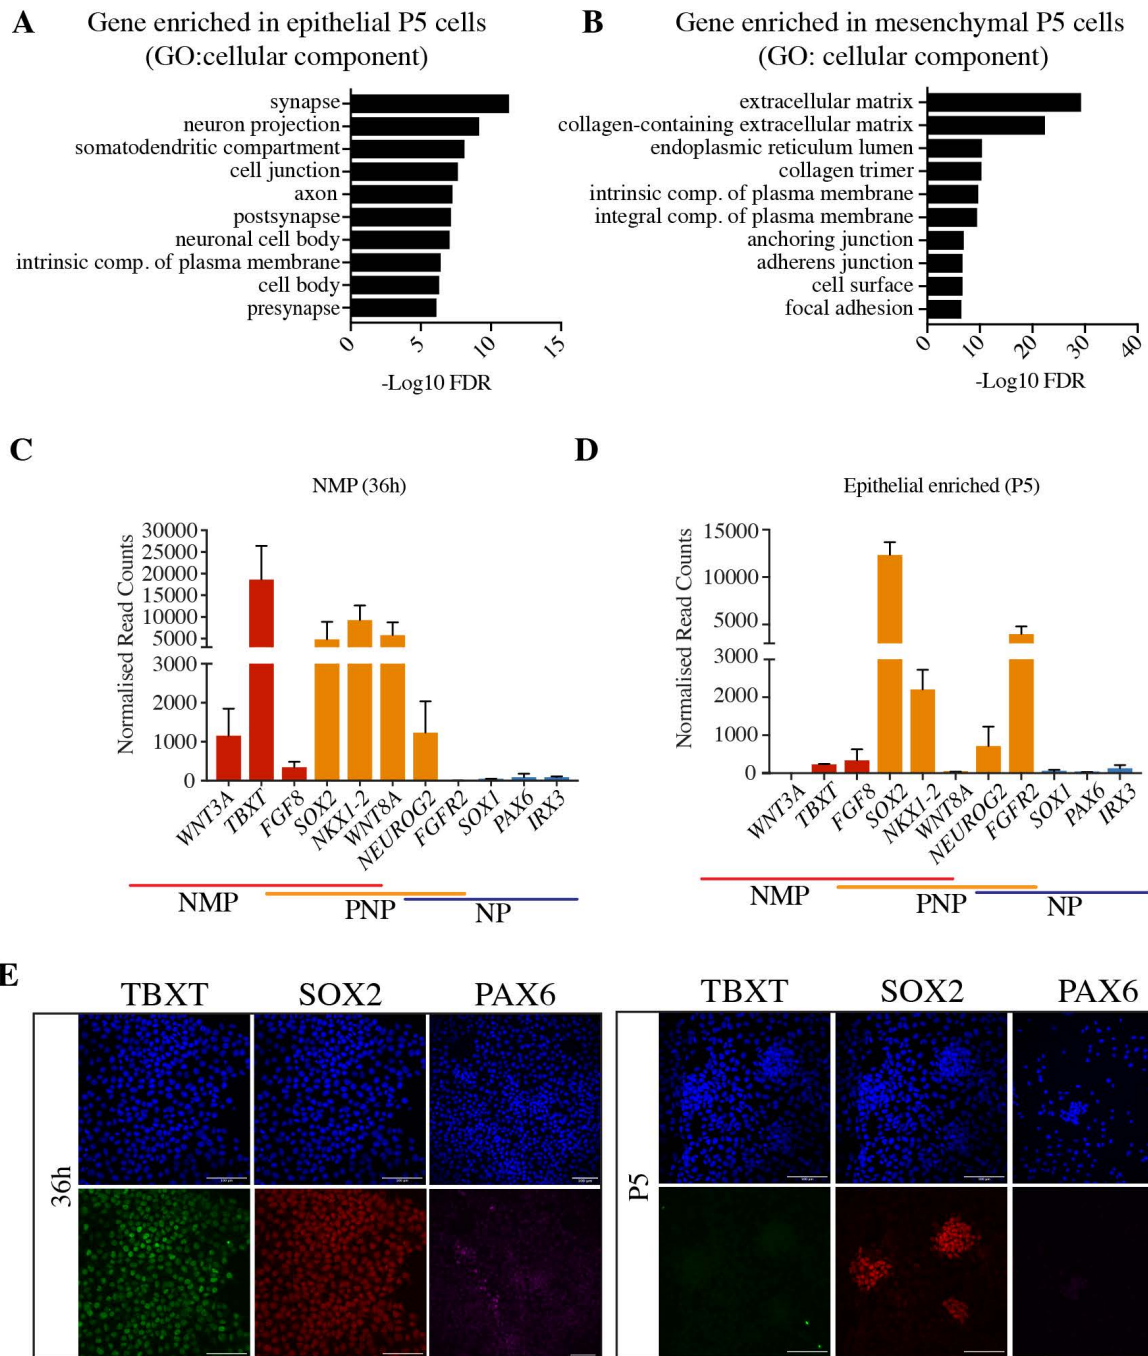

723

724 **Figure 4: NMP-derived cells stabilise as epithelial pre-neural progenitors.**

725 A,B) Graphs showing cellular component GO analysis for differentially expressed genes in P5 epithelial

726 samples (A) and P5 mesenchymal samples (B). The corresponding Benjamini and Hochberg adjusted

727 p-values (FDR) are shown. C, D) Normalised expression levels of known markers of NMPs (WNT3A,

728 TBXT, FGF8, SOX2, NKX1-2 and WNT8A/C), PNP (SOX2, NKX1-2, WNT8A/C, NEUROG2 and FGFR2) and

729 NPs (PAX6, IRX3, FGFR2, NEUROG2 and SOX1) at 36h (C) and in P5 epithelial colonies (D) as determined

730 by RNA-seq. Error bars show SEM (n = 3 biological replicates). E) Representative immunostaining of

731 TBXT (green), SOX2 (red) and PAX6 (magenta) confirming the expression patterns shown in (A and B).

732 Scale bars, 100  $\mu$ m.

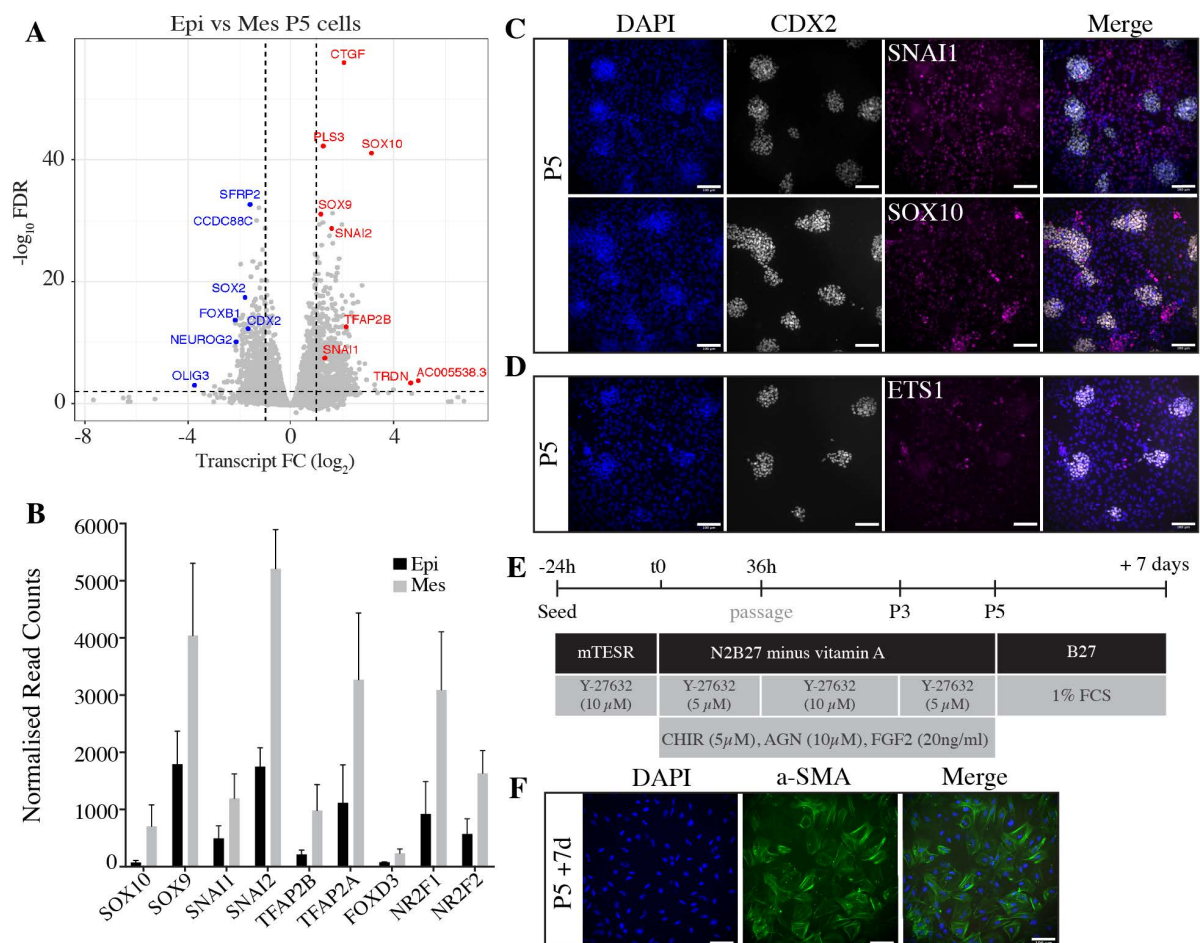

733

734 **Figure 5: Mesenchymal cells have a neural crest identity.**

735 A) Volcano plot showing differential expression between epithelial and mesenchymal cell at P5.

736 Significant genes are highlighted in blue (epithelial) and red (mesenchymal). B) Normalised expression

737 levels of known markers of NC genes (*SOX10*, *SOX9*, *SNAI1*, *SNAI2*, *TFAP2B*, *TFAP2A*, *FOXD3*, *NR2F1*

738 and *NR2F2*) which are significantly upregulated in mesenchymal enriched samples compared to

739 epithelial as determined by RNA-seq. Error bars show SEM (n = 3 biological replicates). (C,D)

740 Representative immunostaining of NC markers SNAI1, SOX10 (C) and ETS1 (D), co-stained with

741 epithelial PNP marker CDX2 (grey) and the nuclear stain DAPI (blue). Scale bar, 100  $\mu$ m. E) Scheme for

742 generating NMP/PNP-derived NC derivative smooth muscle. F) Representative immunostaining of  $\alpha$ -

743 SMA (green) and nuclear stain DAPI (blue) in NMP/PNP-derived vasculature smooth muscle cells. Scale

744 bar, 100  $\mu$ m.



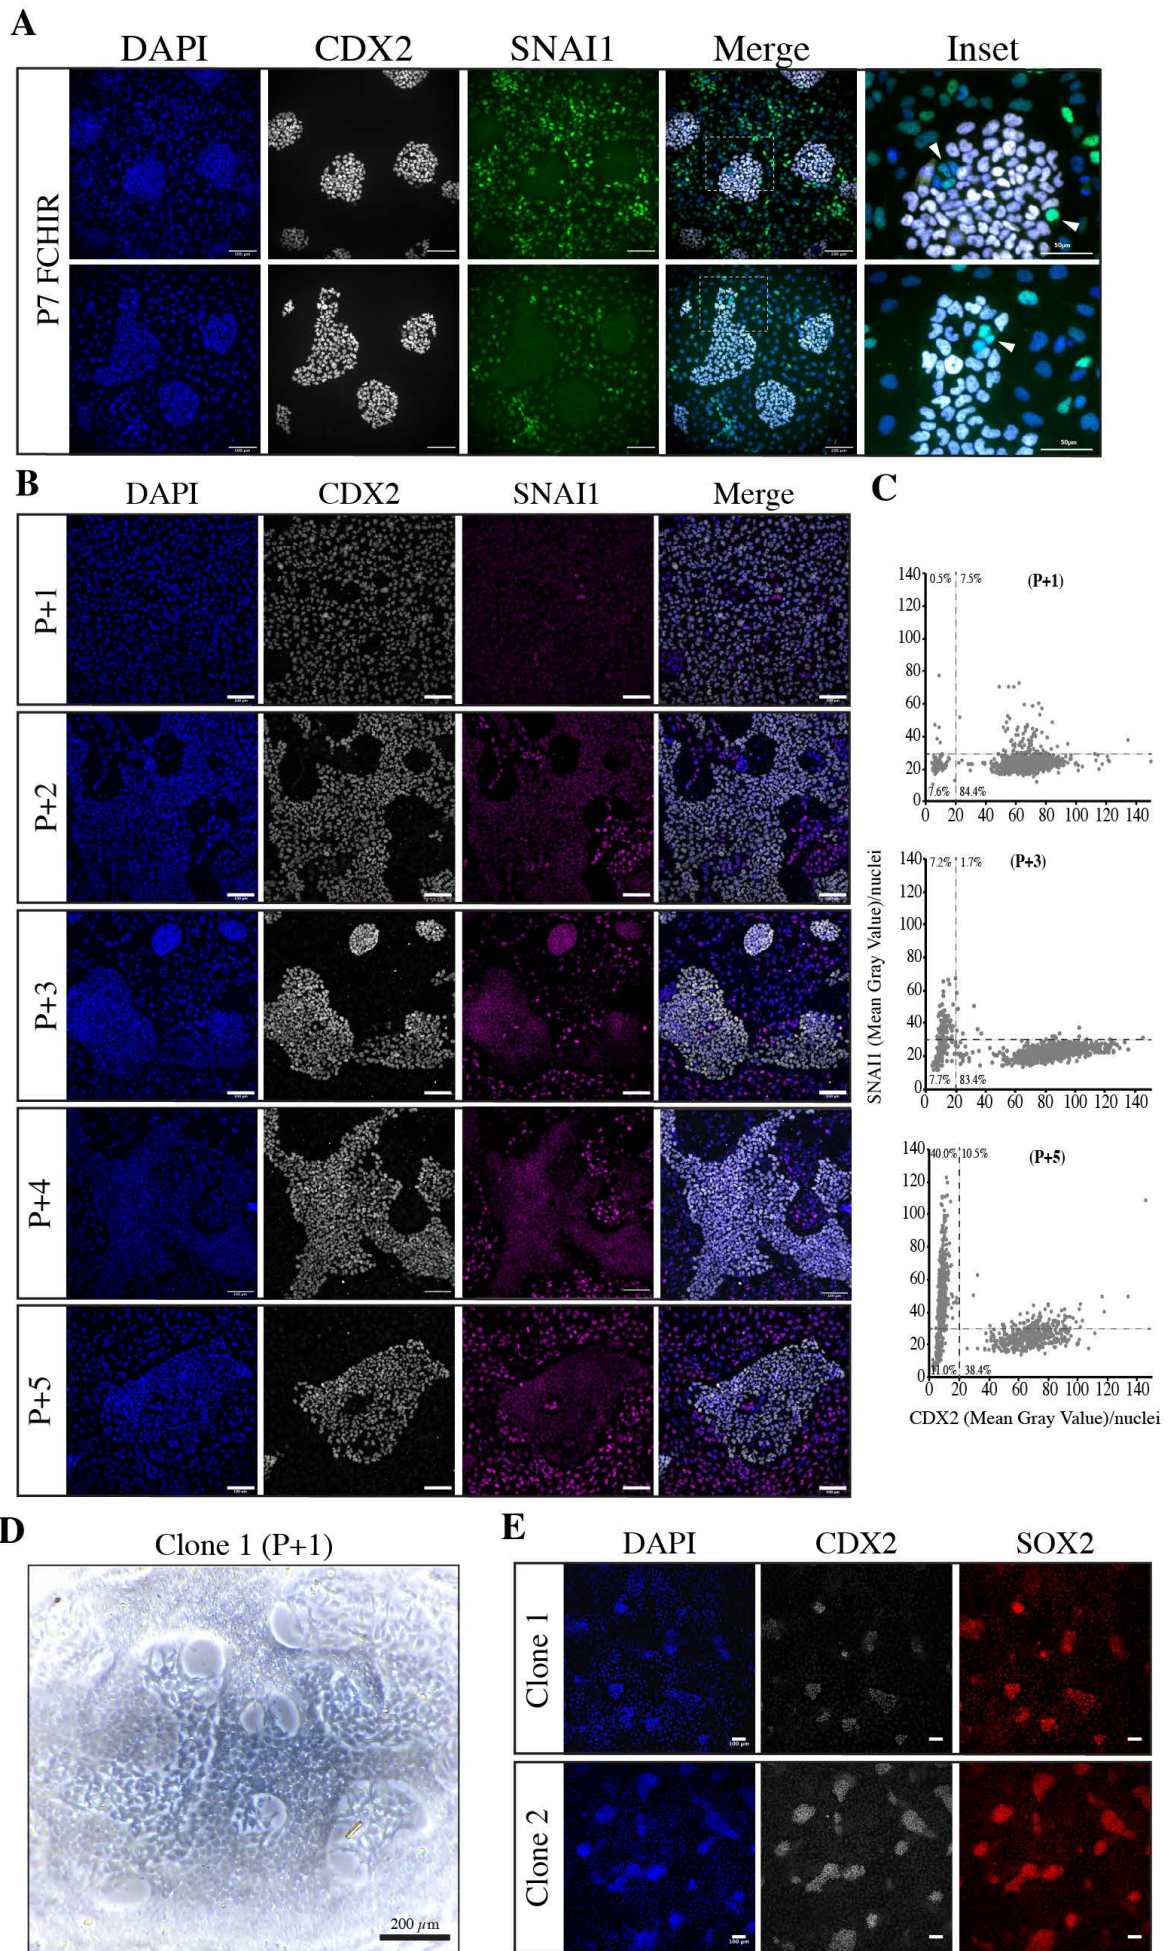

746 **Figure 6: Epithelial PNPs give rise to migratory neural crest cells.**

747 A) Representative immunostaining of CDX2 (grey) and SNAI1 (green) co-stained with nuclear stain  
748 DAPI (blue) in P7 PNP/NC cultures. Inset shows magnified region identified by white dashed line and  
749 arrow marks examples of CDX2/SOX2/SNAI1<sup>+</sup> nuclei within PNP clusters. Scale bars, 100µm or 50 µm  
750 (inset). B) Representative immunostaining of CDX2 (grey), SNAI1 (magenta) and nuclear stain DAPI  
751 (blue) in epithelial P5 cells which were serially passaged for four passages (P+1 to p+4) following  
752 selective detachment enrichment. (C) Dot plot showing the mean grey value/nuclei of CDX2 and SNAI1  
753 at P+1, P+3 and P+4 panels shown in (B). Each graph shows >900 nuclei. D) Representative bright-field  
754 image of a sub-clone generated from the epithelial enriched fragment after 1 passage. Scale bar, 200  
755 µm E) Representative immunostaining analysis of CDX2 (grey), SOX2 (red) and nuclear stain DAPI  
756 (blue) in two independent sub-clones generated from the epithelial enriched samples after serial 4  
757 passages. Scale bar, 100 µm.



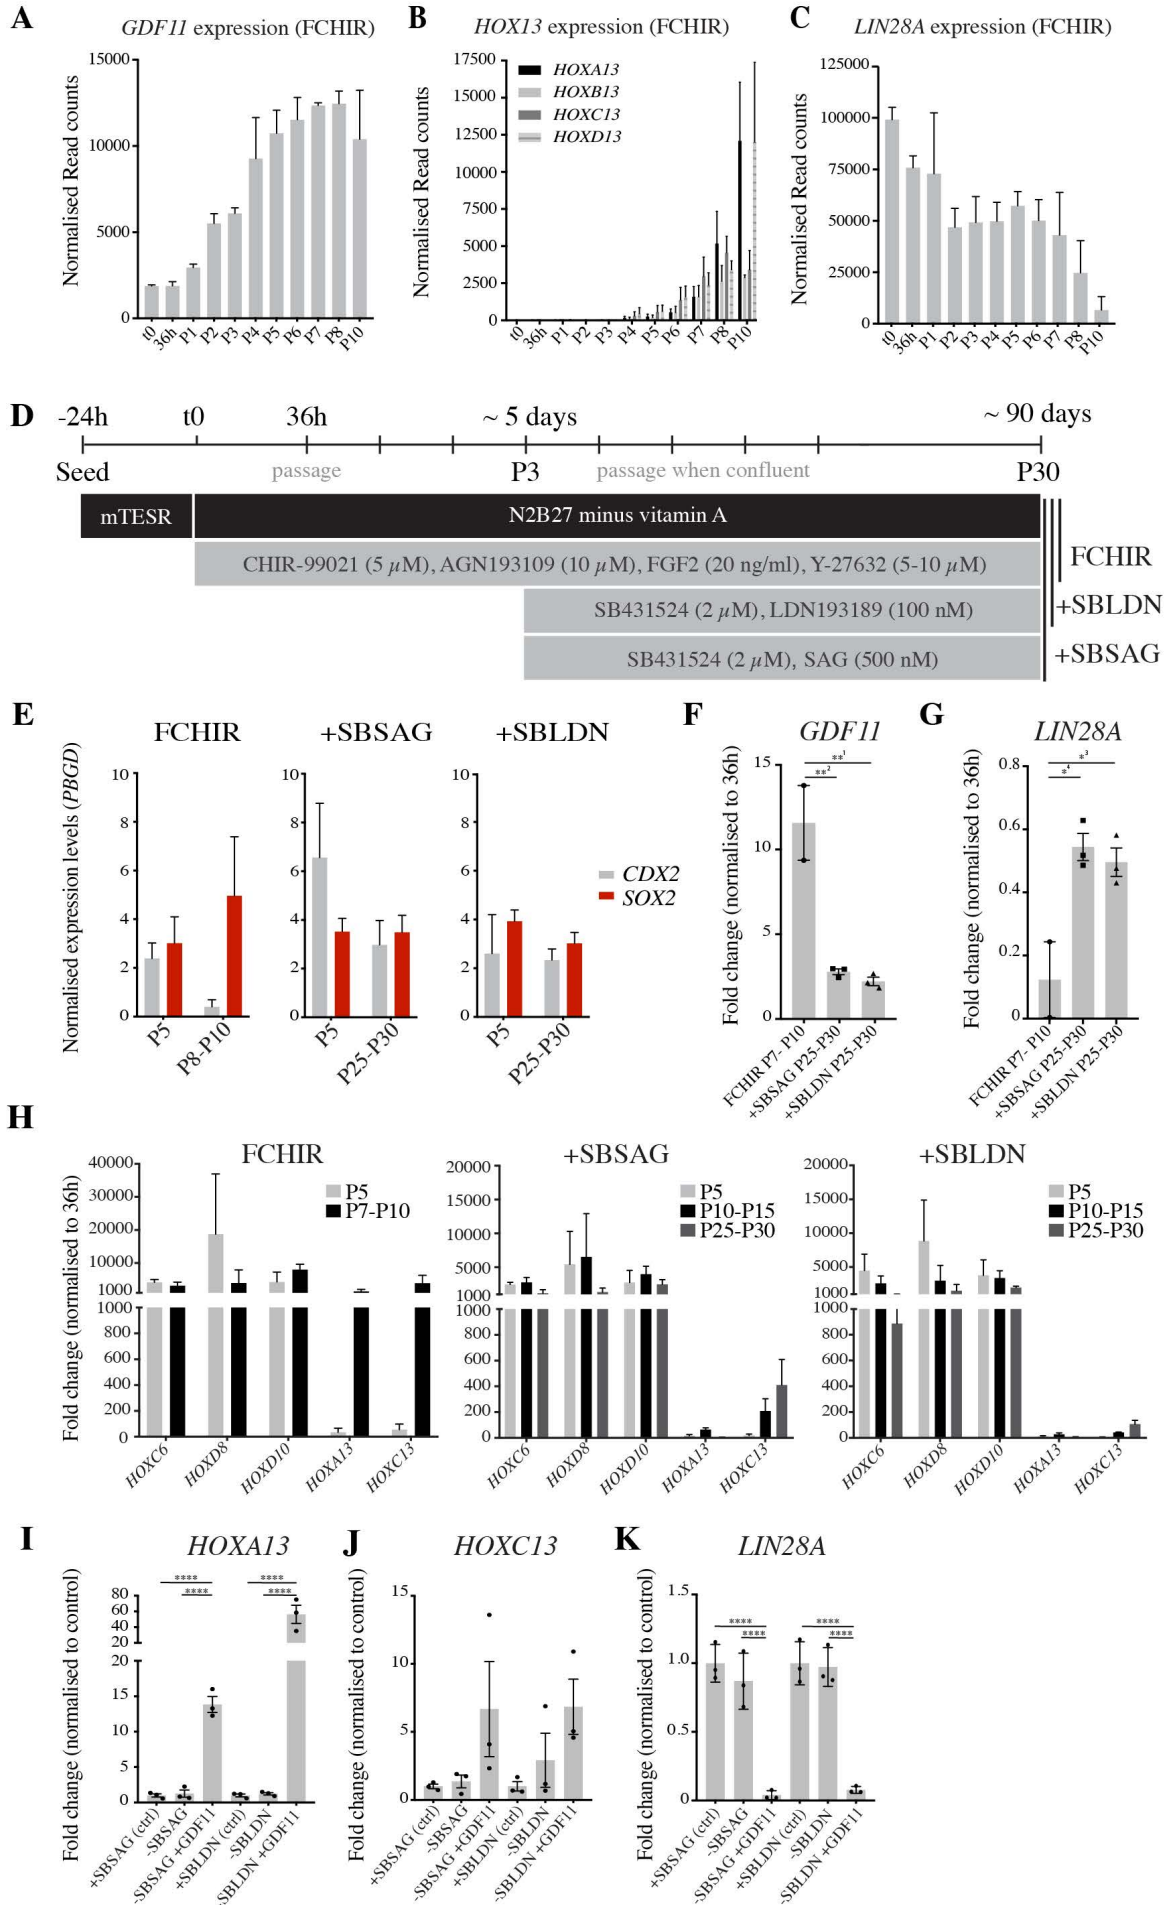

759 **Figure 7: Modulation of TGF- $\beta$  and SHH signalling locks in A/P information.**  
760 A,B,C) Normalised expression levels of *GDF11* (A), *HOX13* (B) and *LIN28A* (C) at each passage  
761 as determined by RNA-seq. Error bars show SEM (n = 3 biological replicates). D) Scheme for  
762 generating and maintaining PNP. At passage 3 either SB and LDN (+SBLDN) were added, or SB and  
763 SAG (+SBSAG) were added to the standard medium (FCHIR). E) Transcriptional quantification (RT-  
764 qPCR) of *CDX2* and *SOX2* at early (P5) and later passages (FCHIR; P8-P10 and +SBLDN and +SBSAG;  
765 P25 -P30). Expression levels normalised to the reference gene *PBGD*. Error bars show SEM (n =  
766 2-5). F, G) Transcriptional quantification (RT-qPCR) of *GDF11* (F) and *LIN28A* (G) shown by fold  
767 change over 36h and normalised to the reference gene *PBGD* in late passages PNP (FCHIR; P8-P10  
768 and +SBLDN and +SBSAG; P25-P30). Error bars show mean with SEM (n = 2/3). \*\* $P^1 = 0.0019$ , \*\* $P^2$   
769 = 0.0014, \* $P^3 = 0.0107$ , \* $P^4 = 0.0174$  (ANOVA) H) Graphs showing the transcriptional quantification  
770 (RT-qPCR) of selected *HOX* genes at early (P5) and mid (FCHIR; P8-P10 and +SBLDN and +SBSAG;  
771 P10-P15) AND late (+SBLDN and +SBSAG; P25-P30) in all conditions tested as indicated in (D).  
772 Expression levels are presented as fold change over the 36h time point and were normalised to the  
773 reference gene *PBGD*. Error bars show mean with SEM (n = 2/3). I,J,K) Transcriptional quantification  
774 (RT-qPCR) of *HOXA13* (I) and *HOXC13* (J) and *LIN28A* (K) in +SBLDN or +SBSAG (ctrl) conditions,  
775 +SBLDN or +SBSAG without SB, LDN or SAG (-SBLDN/-SBSAG) and +SBLDN or +SBSAG without  
776 SB, LDN or SAG but with *GDF11* (-SBLDN/-SBSAG +*GDF11*). All experiments were completed  
777 with P25-P30 cultures. Expression levels normalised to the reference gene *PBGD*. Error bars show  
SEM (n = 2-5). \*\*\*\* $P < 0.001$  (ANOVA).

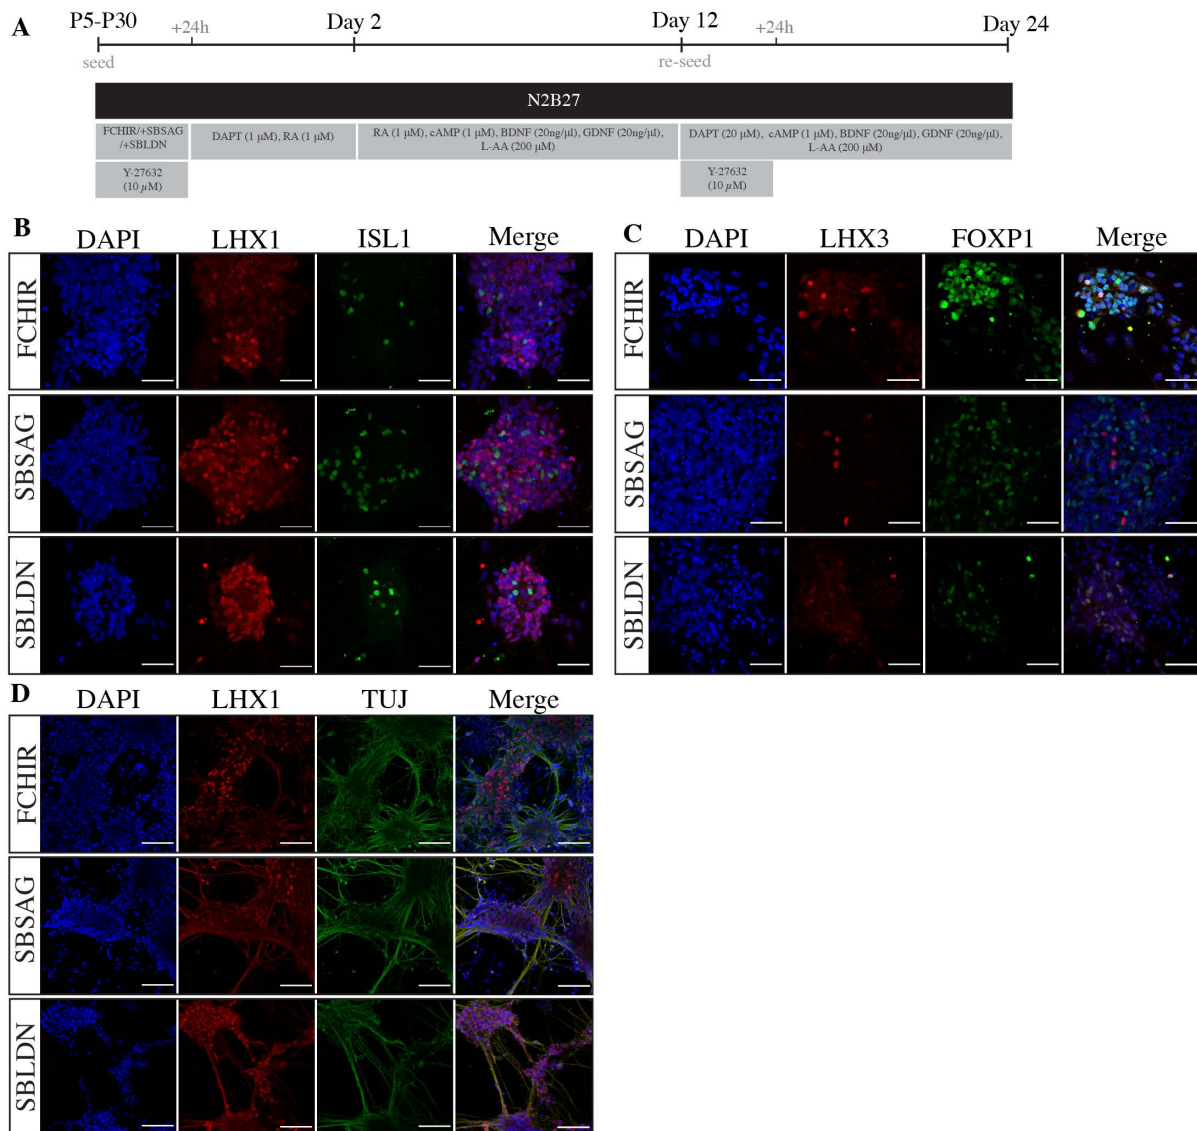

778

779 **Figure 8: PNP can be differentiated into neural derivatives.**

780 A) Scheme for generating differentiated neuronal cultures. PNP are dissociated and plated at low  
 781 density and then exposed to neural inducing factors shown. B,C,D) Representative immunostaining of  
 782 differentiated neuronal cultures showing (B) LIM homeobox 1 (LHX1, red) and Islet1 (ISL1, green) or  
 783 (C) LIM homeobox 3 (LHX3, red) and FOXP1 (red). Nuclei were stained with DAPI (blue) and (D) LHX1  
 784 (red) paired with  $\beta$ III-tubulin (TUJ, green) Scale bars, 100 $\mu$ m.

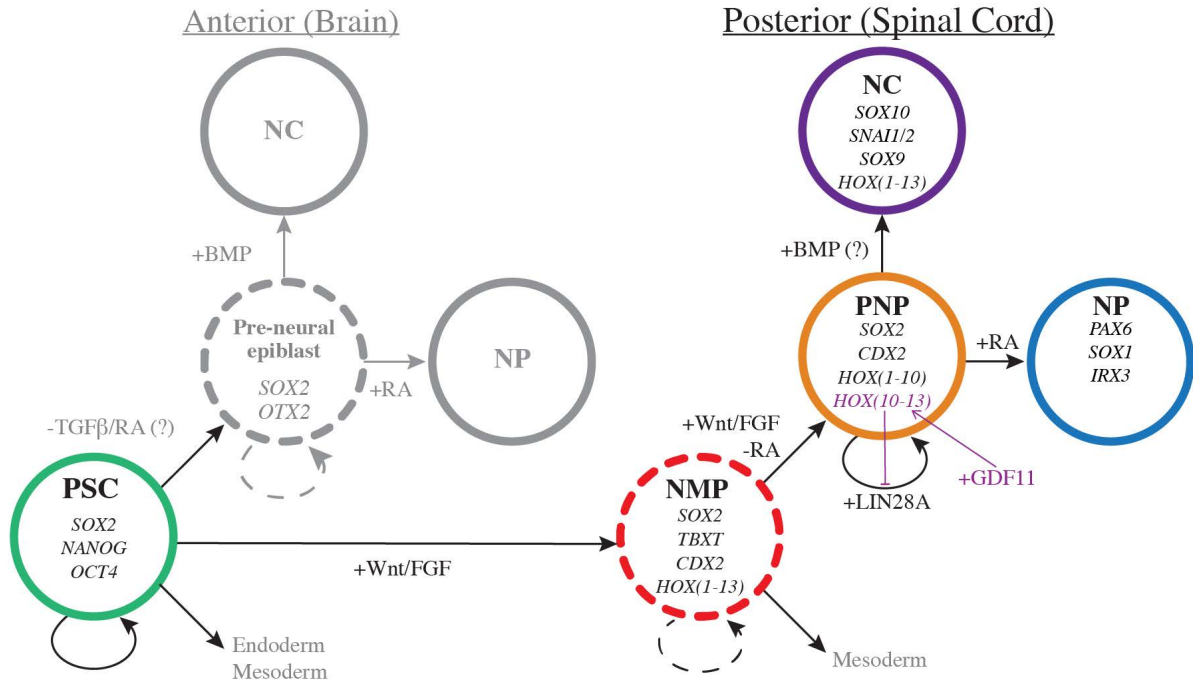

785

786 **Figure 9: NMP-derived PNPs self-renew, give rise to trunk NC or can be differentiated to neurons.**

787 Diagrammatic model summarising the generation of anterior (brain) and posterior (spinal cord) neural  
 788 progenitors *in vitro*. When treated with inhibitors of TGF- $\beta$  signalling pluripotent stem cells (PSC) in  
 789 the give rise to a transient pre-neural epiblast state, which in turn give rise to anterior NC and neural  
 790 progenitors (NP) of the brain. NMPs, which give rise to posterior neural tissue, are generated from  
 791 PSC in response to Wnt/FGF signalling. In sustained Wnt/FGF signalling and in the absence of RA,  
 792 NMPs to differentiate to a PNP intermediate which are able to self-renew and give rise to neural  
 793 progenitors or NC in the presence of RA or BMP, respectively. GDF11 signaling results in upregulation  
 794 of terminal HOX genes and results in loss of LIN28A ultimately leading to loss of PNP self renewal.  
 795 Transient cell states are shown using dotted lines and cells with self-renewal capacity are shown with  
 796 curved arrows.

797

798

799

800

801

802

803

804

805

806 **SUPPLEMENTARY FIGURES**

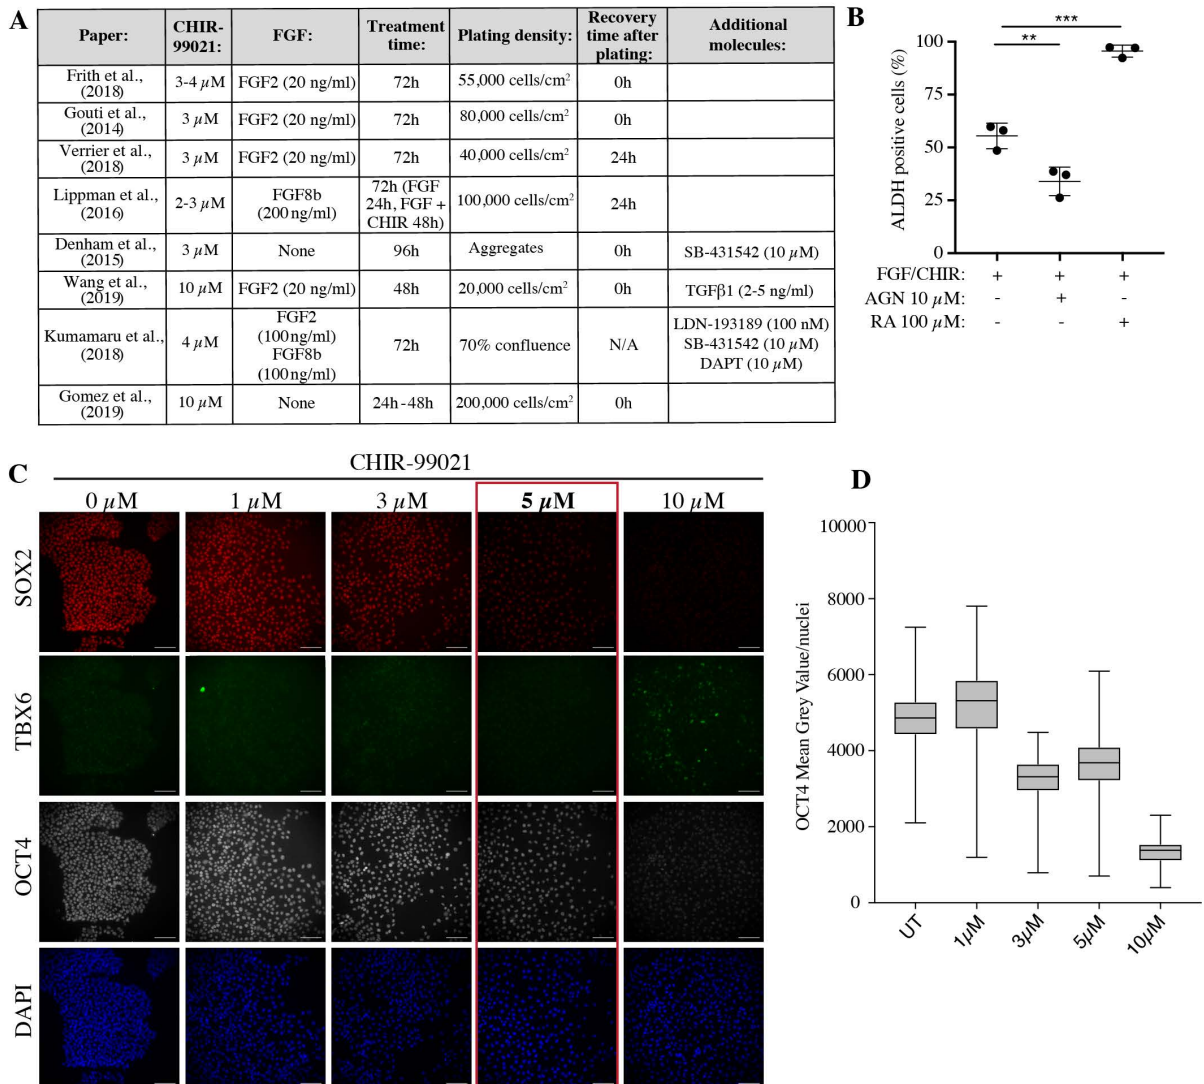

807

808 **Figure S1: NMP-like cells are induced by combined Wnt/FGF and inhibited RA signalling.**

809 A) Summary of protocols used in recent studies to generate NMP-like cells from hPSCs. Table includes  
810 plating density and recovery time after plating, as well as the exogenous molecules and treatment  
811 time used. B) ALDEFLUOR assay was used to measure the expression of aldehyde dehydrogenases  
812 (ALDH) in 36h samples generated in three conditions: 1) FGF2 and CHIR only, 2) FGF, CHIR and AGN or  
813 3) FGF, CHIR and RA. Samples were analysed using flow cytometry and results were presented as the  
814 percentage of cells expressing ALDH. Error bars show SD (n = 3 experiments). \*\*P <0.01, \*\*\*P <0.001  
815 (ANOVA). C) Representative immunostaining SOX2 (red), TBX6 (green) OCT4 (grey) and the nuclear  
816 stain DAPI (blue) after 36h treatment following scheme as shown in Figure 1A with 0  $\mu$ M, 1  $\mu$ M, 3  $\mu$ M,  
817 5  $\mu$ M and 10  $\mu$ M CHIR-99021. Scale bars, 100  $\mu$ m. D) Box-plot showing mean grey value/nuclei  
818 quantified from repeat experiments as shown in (C). Plot show data points collected from 2  
819 experiments (>450 nuclei/experiment).



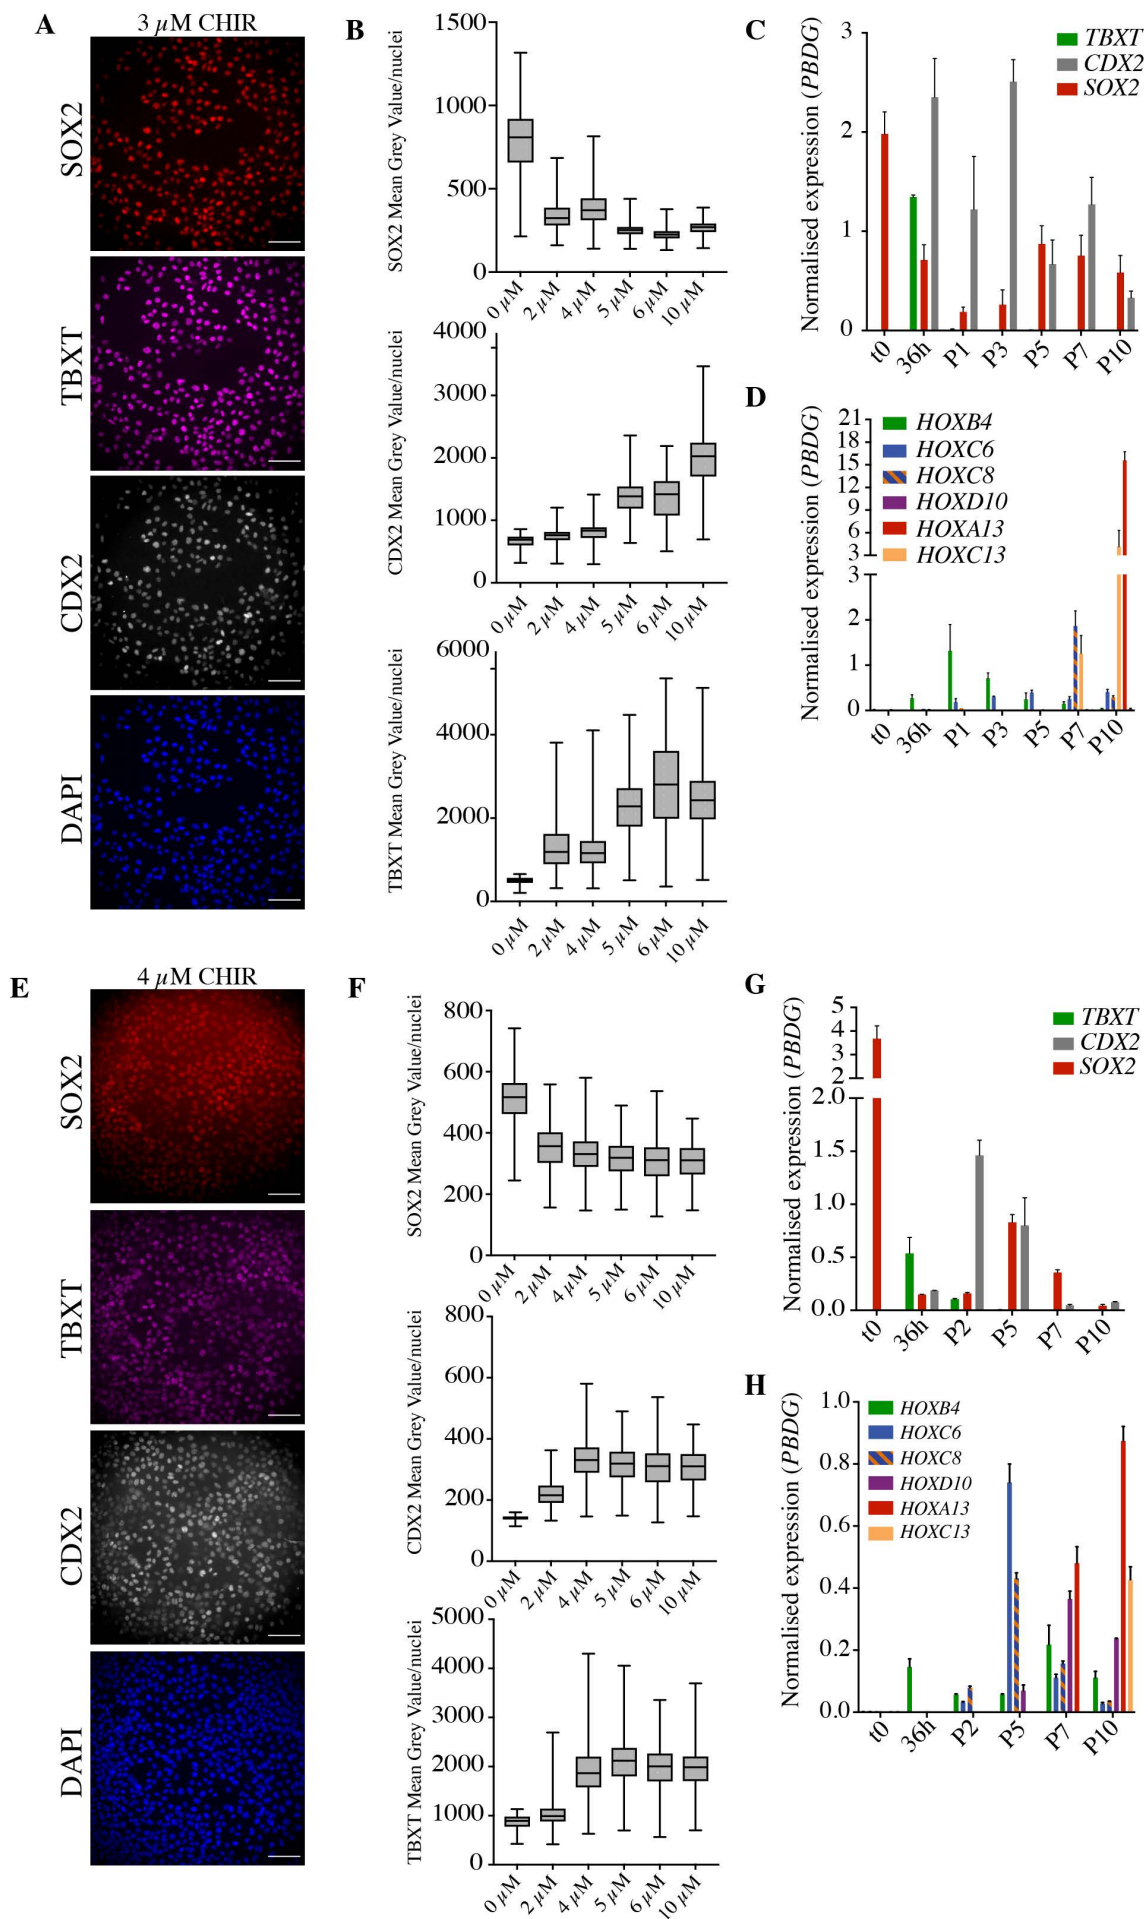

821 **Figure S2: Generation of NMP-like cells in multiple hPSC lines requires modulation of the Wnt**  
822 **pathway.**

823 A, B) Optimal CHIR concentration (3  $\mu$ M) was optimised in WA01 (H1) hESCs. (A) Representative  
824 immunostaining of NMP markers SOX2 (red) and CDX2 (grey) and TBXT (magenta) at 36h after  
825 following treatment scheme with 3  $\mu$ M CHIR and (B) quantification markers over a range of CHIR  
826 concentrations between 1-10  $\mu$ M. Scale bars, 100 $\mu$ m. C,D) Transcriptional analysis (RT-qPCR) of NMP  
827 markers *TBXT*, *SOX2* and *CDX2* (C) and selected HOX genes (D) up to passage 10. Expression levels are  
828 normalised to the reference gene *PBDG*. Error bars show SD, (n=3 technical replicates). E, F) Optimal  
829 CHIR concentration (4  $\mu$ M) was optimised in AICS ZO1-mEGFP (AICS-0024) iPSCs hESCs. (E)  
830 Representative immunostaining of NMP markers SOX2 (red) and CDX2 (grey) and TBXT (magenta) at  
831 36h after following treatment scheme with 3  $\mu$ M CHIR and (F) quantification markers over a range of  
832 CHIR concentrations between 1-10  $\mu$ M. Scale bars, 100 $\mu$ m. G,H) Transcriptional analysis (RT-qPCR) of  
833 NMP markers *TBXT*, *SOX2* and *CDX2* (G) and selected HOX genes (H) up to passage 10. Expression  
834 levels are normalised to the reference gene *PBDG*. Error bars show SD, (n=3 technical replicates).  
835

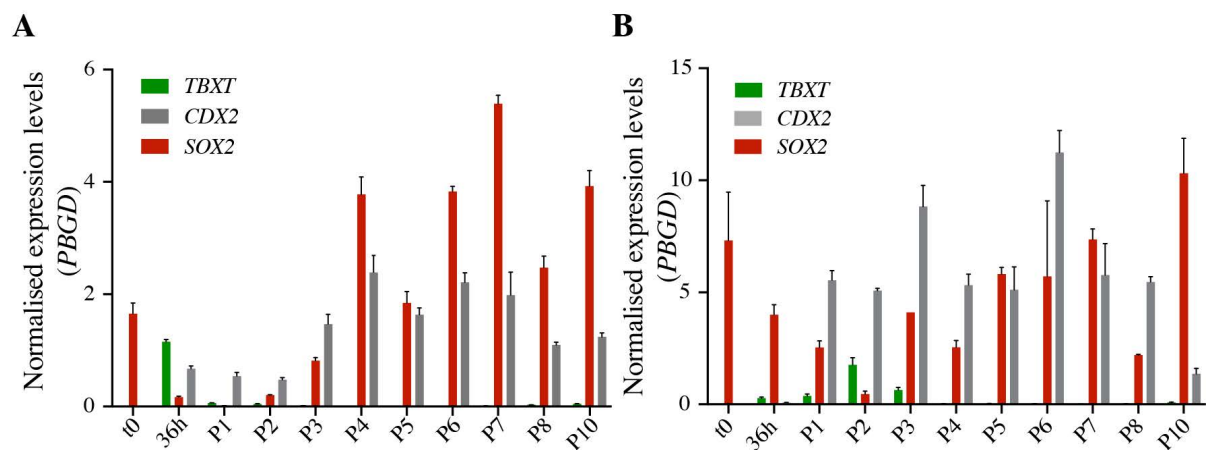

836

837 **Figure S3: CDX2 and SOX2 expression can be maintained for 10 passages.**

838 A,B) Transcriptional analysis (RT-qPCR) of two independent experiments showing NMP markers *TBXT*,  
839 *SOX2* and *CDX2* at each passage, up to passage 10. Expression levels are normalised to the reference  
840 gene *PBDG*. Error bars show SD, (n=3 technical replicates).



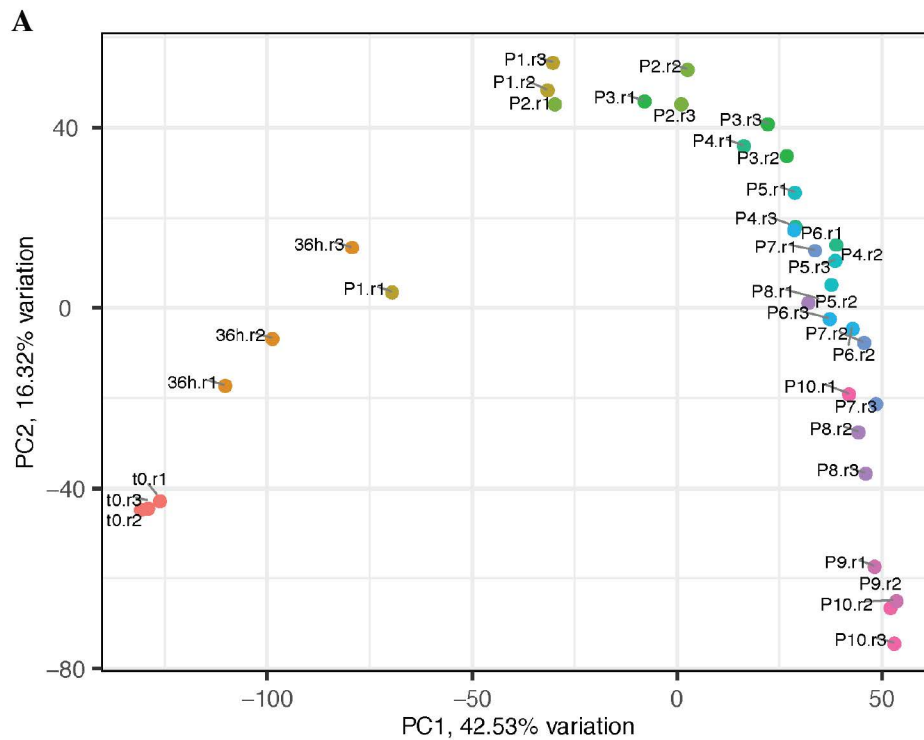

841

842 **Figure S4: Principal component analysis of RNA-Seq samples collected over passaging.**

843 A) PCA analysis show biological replicates for each passage cluster together and show small biological  
844 variation between experiments.

845

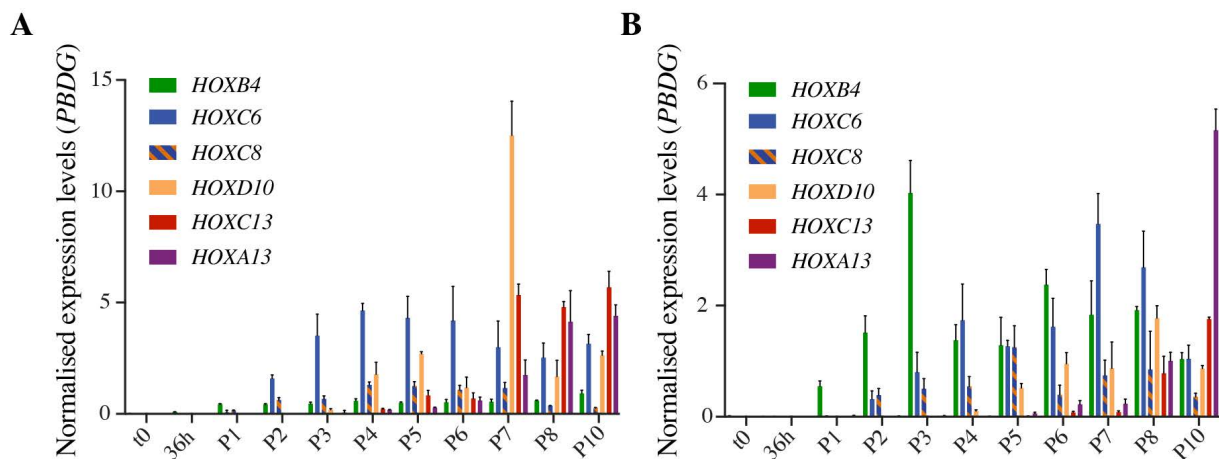

846

847 **Figure S5: Full collinear expression of the HOX gene cluster occurs over 10 passages.**

848 A,B) Transcriptional analysis (RT-qPCR) of two independent experiments showing selected HOX genes  
849 at each passage up to passage 10. Expression levels are normalised to the reference gene *PBDG*. Error  
850 bars show SD, (n=3 technical replicates).

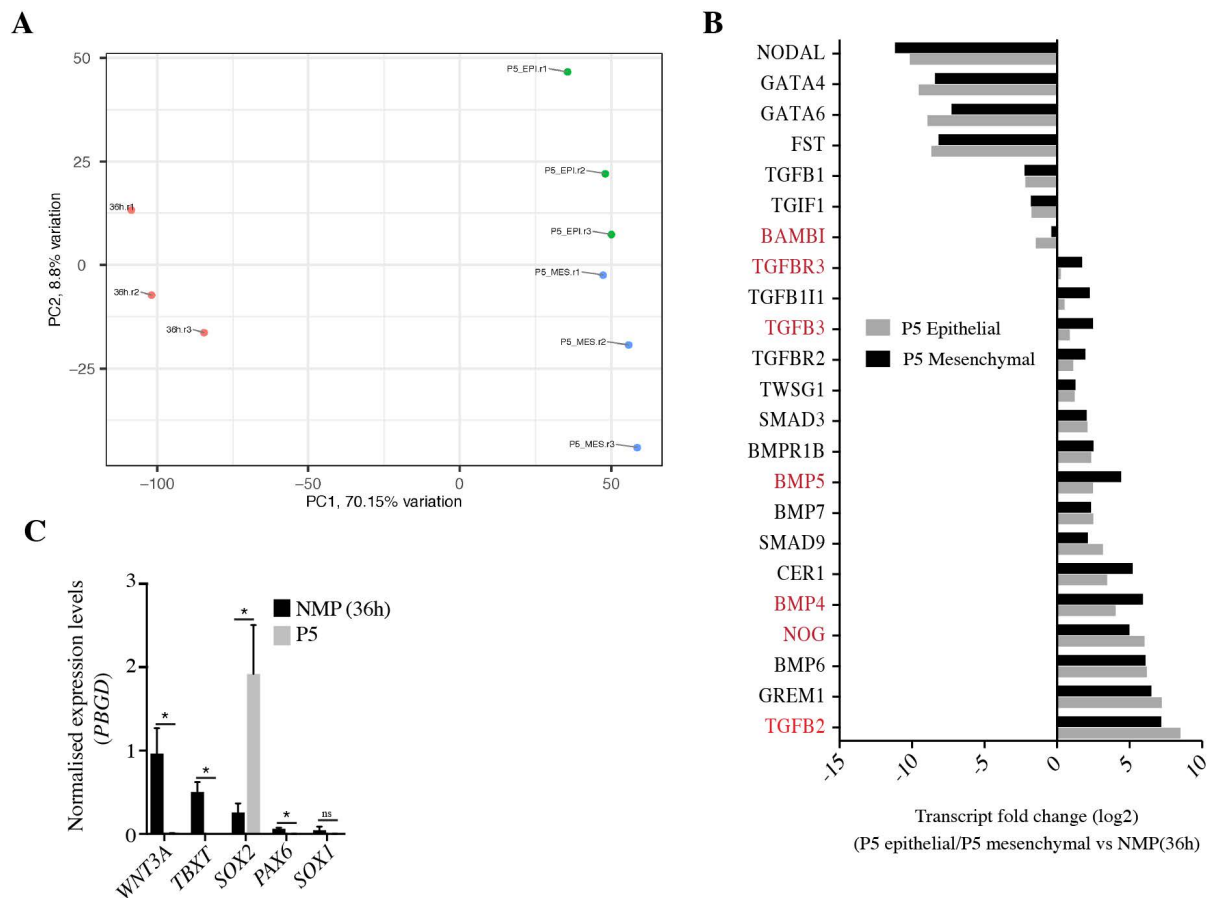

851

852 **Figure S6: Principal component analysis of mesenchymal and epithelial samples analysed by bulk**  
 853 **RNA-sequencing.**

854 A) PCA analysis showing biological replicates for the mesenchymal (MES) and epithelial (EPI) enriched  
 855 samples and NMP samples (36h). B) Graph showing transcriptional fold change (FC) of selected TGF  
 856 superfamily genes in P5 epithelial and P5 mesenchymal samples over 36h samples. Genes which are  
 857 statistically differentially expressed between epithelial and mesenchymal samples are highlighted in  
 858 red. C) Transcript levels of *WNT3A*, *TBXT*, *SOX2*, *PAX6* and *SOX1* in NMP (36h) and P5 samples as  
 859 measured by RT-qPCR. Expression levels were normalised to the reference gene *PBGD*. Error bars  
 860 show SEM (n=2/3 experiments), \*P < 0.05 (unpaired t-test).

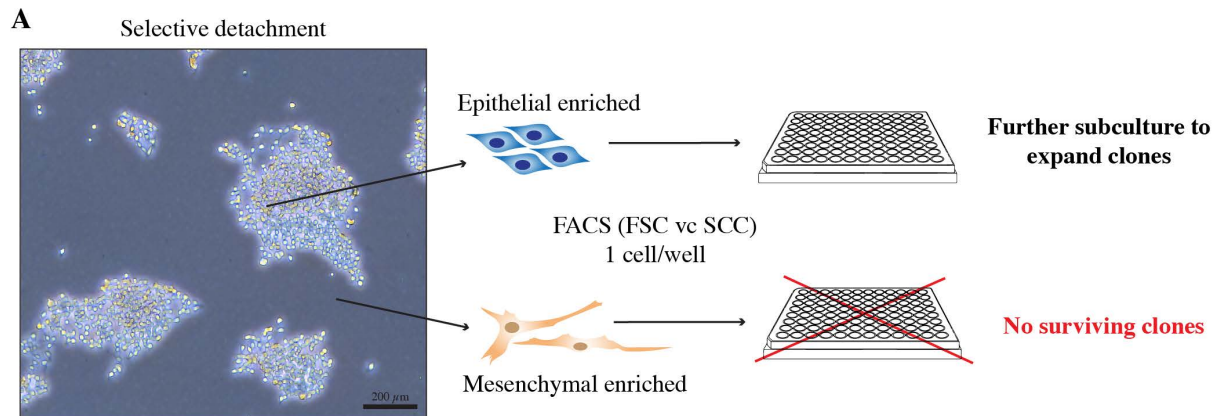

861

862 **Figure S7: Generating sub-clonal populations from PNP/NC cell enriched samples**

863 A) Scheme to generate sub-clonal populations from mesenchymal- or epithelial- enriched samples.

864 Cells were selectively detached to separate epithelial from mesenchymal cell populations and single

865 cells from each enriched cell sample were sorted (FACS) into wells of a 96 well plate. Surviving sub-

866 clones were expanded for analysis.

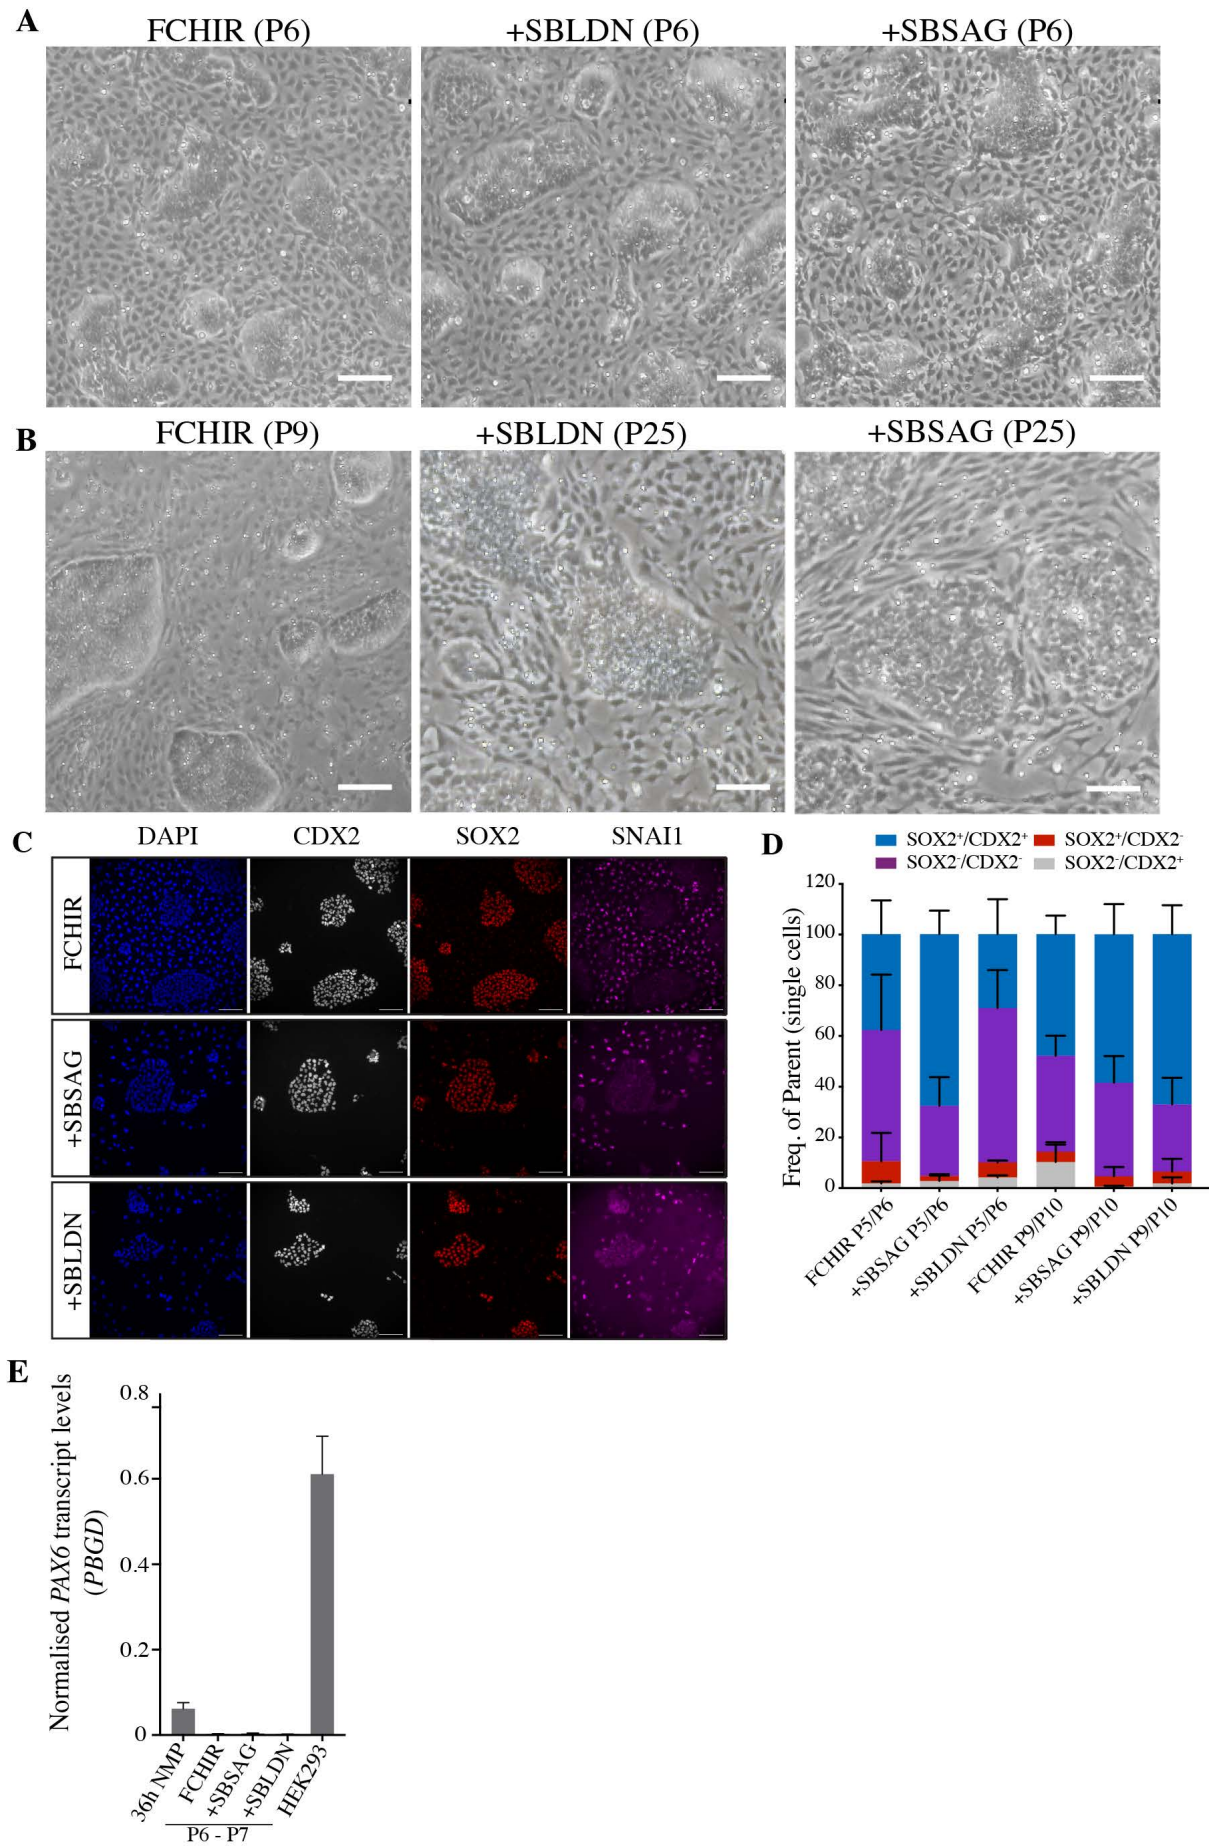

868 **Figure S8: Upregulation of terminal *HOX* genes is significantly delayed, and neural marker gene *PAX6***  
869 **remains silent, in +SBSAG and +SBLDN conditions**

870 A, B) Representative brightfield images and PNP/NC at mid (P5) and late passages (FCHIR:P10,  
871 +SBLDN and +SBSAG: P25). Scale bar, 200  $\mu$ m. C) Representative immunostaining of P5 cells for CDX2  
872 (grey), SOX2 (red) and SNAI1 (magenta) under conditions indicated in Figure 7D. Scale bar, 100  $\mu$ m.  
873 D) SOX2/CDX2 flow cytometry analysis of FCHIR and +SBLDN and +SBSAG samples at early and late  
874 passages. Cells were analysed using SOX2 and CDX2 conjugated antibodies and plotted as percentage  
875 of expression. Error bars show mean with SEM (n = 3). C) Quantification of *PAX6* transcript levels  
876 under various conditions as indicated in Figure 7D, and in comparison to HEK293 (positive control)  
877 cells. Expression levels were normalised to reference gene *PBGD*. Error bars show mean with SEM (n  
878 = 2-3).  
879

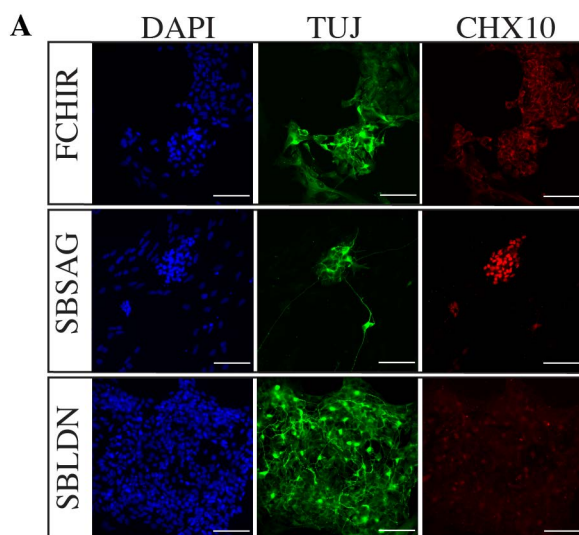

881 **Figure S9: NMP-derived PNPs treated with SHH generate ventralised neuronal cultures.**

882 A) Representative immunostaining of ventral neurons stained with CHX10 (red) paired with  $\beta$ III-  
883 tubulin (TUJ, green) and nuclear stain DAPI (blue). Scale bars, 100 $\mu$ m.

884

885

886

887

888

889

890



891 **REFERENCES**

- 892 **Abu-Abed, S., Dollé, P., Metzger, D., Beckett, B., Chambon, P. & Petkovich, M.** (2001). The  
893 retinoic acid-metabolizing enzyme, CYP26A1, is essential for normal hindbrain  
894 patterning, vertebral identity, and development of posterior structures. *Genes &*  
895 *development*. **15**, 226-240.
- 896 **Aires, R., de Lemos, L., Novoa, A., Jurberg, A. D., Mascrez, B., Duboule, D. & Mallo, M.** (2019).  
897 Tail Bud Progenitor Activity Relies on a Network Comprising Gdf11, Lin28, and Hox13  
898 Genes. *Dev Cell*. **48**, 383-395 e8.
- 899 **Aires, R., Jurberg, A. D., Leal, F., NÓvoa, A., Cohn, M. J. & Mallo, M.** (2016). Oct4 Is a Key  
900 Regulator of Vertebrate Trunk Length Diversity. *Developmental Cell*. **38**, 262-274.
- 901 **Amin, S., Neijts, R., Simmini, S., van Rooijen, C., Tan, S. C., Kester, L., van Oudenaarden, A.,**  
902 **Creyghton, M. P. & Deschamps, J.** (2016). Cdx and T Brachyury Co-activate Growth  
903 Signaling in the Embryonic Axial Progenitor Niche. *Cell Rep*. **17**, 3165-3177.
- 904 **Andersson, O., Reissmann, E. & Ibanez, C. F.** (2006). Growth differentiation factor 11 signals  
905 through the transforming growth factor-beta receptor ALK5 to regionalize the  
906 anterior-posterior axis. *EMBO Rep*. **7**, 831-7.
- 907 **Baillie-Benson, P., Moris, N. & Martinez Arias, A.** (2020). Pluripotent stem cell models of  
908 early mammalian development. *Curr Opin Cell Biol*. **66**, 89-96.
- 909 **Brons, I. G., Smithers, L. E., Trotter, M. W., Rugg-Gunn, P., Sun, B., Chuva de Sousa Lopes, S.**  
910 **M., Howlett, S. K., Clarkson, A., Ahrlund-Richter, L., Pedersen, R. A., et al.** (2007).  
911 Derivation of pluripotent epiblast stem cells from mammalian embryos. *Nature*. **448**,  
912 191-5.
- 913 **Brown, J. M. & Storey, K. G.** (2000). A region of the vertebrate neural plate in which  
914 neighbouring cells can adopt neural or epidermal fates. *Current Biology*. **10**, 869-872.
- 915 **Cajal, M., Lawson, K. A., Hill, B., Moreau, A., Rao, J., Ross, A., Collignon, J. & Camus, A.**  
916 (2012). Clonal and molecular analysis of the prospective anterior neural boundary in  
917 the mouse embryo. *Development*. **139**, 423-36.
- 918 **Cambray, N. & Wilson, V.** (2002). Axial progenitors with extensive potency are localised to  
919 the mouse chordoneural hinge. *Development*. **129**, 4855.
- 920 **Cambray, N. & Wilson, V.** (2007). Two distinct sources for a population of maturing axial  
921 progenitors. *Development*. **134**, 2829.
- 922 **Cano, A., Perez-Moreno, M. A., Rodrigo, I., Locascio, A., Blanco, M. J., del Barrio, M. G.,**  
923 **Portillo, F. & Nieto, M. A.** (2000). The transcription factor snail controls epithelial-  
924 mesenchymal transitions by repressing E-cadherin expression. *Nat Cell Biol*. **2**, 76-83.
- 925 **Chambers, S. M., Fasano, C. A., Papapetrou, E. P., Tomishima, M., Sadelain, M. & Studer, L.**  
926 (2009). Highly efficient neural conversion of human ES and iPS cells by dual inhibition  
927 of SMAD signaling. *Nat Biotechnol*. **27**, 275-80.
- 928 **Chen, J., Bardes, E. E., Aronow, B. J. & Jegga, A. G.** (2009). ToppGene Suite for gene list  
929 enrichment analysis and candidate gene prioritization. *Nucleic Acids Res*. **37**, W305-  
930 11.
- 931 **Clovis, Y. M., Seo, S. Y., Kwon, J.-s., Rhee, J. C., Yeo, S., Lee, J. W., Lee, S. & Lee, S.-K.** (2016).  
932 Chx10 Consolidates V2a Interneuron Identity through Two Distinct Gene Repression  
933 Modes. *Cell Reports*. **16**, 1642-1652.
- 934 **Cunningham, T. J., Kumar, S., Yamaguchi, T. P. & Duester, G.** (2015). Wnt8a and Wnt3a  
935 cooperate in the axial stem cell niche to promote mammalian body axis extension.  
936 *Dev Dyn*. **244**, 797-807.

- 937 **Cuny, G. D., Yu, P. B., Laha, J. K., Xing, X., Liu, J.-F., Lai, C. S., Deng, D. Y., Sachidanandan, C.,**  
938 **Bloch, K. D. & Peterson, R. T.** (2008). Structure-activity relationship study of bone  
939 morphogenetic protein (BMP) signaling inhibitors. *Bioorganic & medicinal chemistry*  
940 *letters*. **18**, 4388-4392.
- 941 **Das, S., Becker, B. N., Hoffmann, F. M. & Mertz, J. E.** (2009). Complete reversal of epithelial  
942 to mesenchymal transition requires inhibition of both ZEB expression and the Rho  
943 pathway. *BMC cell biology*. **10**, 94-94.
- 944 **Delfino-Machin, M., Lunn, J. S., Breitkreuz, D. N., Akai, J. & Storey, K. G.** (2005). Specification  
945 and maintenance of the spinal cord stem zone. *Development*. **132**, 4273-83.
- 946 **Delile, J., Rayon, T., Melchionda, M., Edwards, A., Briscoe, J. & Sagner, A.** (2019). Single cell  
947 transcriptomics reveals spatial and temporal dynamics of gene expression in the  
948 developing mouse spinal cord. *Development*. **146**,
- 949 **Denans, N., Imura, T. & Pourquie, O.** (2015). Hox genes control vertebrate body elongation  
950 by collinear Wnt repression. *Elife*. **4**,
- 951 **Deng, C. X., Wynshaw-Boris, A., Shen, M. M., Daugherty, C., Ornitz, D. M. & Leder, P.** (1994).  
952 Murine FGFR-1 is required for early postimplantation growth and axial organization.  
953 *Genes Dev*. **8**, 3045-57.
- 954 **Denham, M., Hasegawa, K., Menhenniott, T., Rollo, B., Zhang, D., Hough, S., Alshawaf, A.,**  
955 **Febbraro, F., Ighaniyan, S., Leung, J., et al.** (2015). Multipotent Caudal Neural  
956 Progenitors Derived from Human Pluripotent Stem Cells That Give Rise to Lineages of  
957 the Central and Peripheral Nervous System. *STEM CELLS*. **33**, 1759-1770.
- 958 **Dias, A., Lozovska, A., Wymeersch, F. J., Novoa, A., Binagui-Casas, A., Sobral, D., Martins, G.**  
959 **G., Wilson, V. & Mallo, M.** (2020). A Tgfbr1/Snai1-dependent developmental module  
960 at the core of vertebrate axial elongation. *Elife*. **9**,
- 961 **Diez del Corral, R., Breitkreuz, D. N. & Storey, K. G.** (2002). Onset of neuronal differentiation  
962 is regulated by paraxial mesoderm and requires attenuation of FGF signalling.  
963 *Development*. **129**, 1681.
- 964 **Diez del Corral, R., Olivera-Martinez, I., Goriely, A., Gale, E., Maden, M. & Storey, K.** (2003).  
965 Opposing FGF and retinoid pathways control ventral neural pattern, neuronal  
966 differentiation, and segmentation during body axis extension. *Neuron*. **40**, 65-79.
- 967 **Dobin, A., Davis, C. A., Schlesinger, F., Drenkow, J., Zaleski, C., Jha, S., Batut, P., Chaisson,**  
968 **M. & Gingeras, T. R.** (2013). STAR: ultrafast universal RNA-seq aligner. *Bioinformatics*.  
969 **29**, 15-21.
- 970 **Edri, S., Hayward, P., Baillie-Johnson, P., Steventon, B. J. & Martinez Arias, A.** (2019). An  
971 epiblast stem cell-derived multipotent progenitor population for axial extension.  
972 *Development*. **146**, dev168187.
- 973 **Francius, C. & Clotman, F.** (2014). Generating spinal motor neuron diversity: a long quest for  
974 neuronal identity. *Cellular and Molecular Life Sciences*. **71**, 813-829.
- 975 **Frith, T. J., Granata, I., Wind, M., Stout, E., Thompson, O., Neumann, K., Stavish, D., Heath,**  
976 **P. R., Ortmann, D., Hackland, J. O., et al.** (2018). Human axial progenitors generate  
977 trunk neural crest cells in vitro. *Elife*. **7**,
- 978 **Gentsch, G. E., Monteiro, R. S. & Smith, J. C.** (2017). Cooperation Between T-Box Factors  
979 Regulates the Continuous Segregation of Germ Layers During Vertebrate  
980 Embryogenesis. *Curr Top Dev Biol*. **122**, 117-159.
- 981 **Gomez, G. A., Prasad, M. S., Wong, M., Charney, R. M., Shelar, P. B., Sandhu, N., Hackland,**  
982 **J. O. S., Hernandez, J. C., Leung, A. W. & Garcia-Castro, M. I.** (2019). WNT/beta-

- 983           catenin modulates the axial identity of embryonic stem cell-derived human neural  
984           crest. *Development*. **146**,
- 985   **Gouti, M., Delile, J., Stamatakis, D., Wymeersch, F. J., Huang, Y., Kleinjung, J., Wilson, V. &**  
986    **Briscoe, J.** (2017). A Gene Regulatory Network Balances Neural and Mesoderm  
987    Specification during Vertebrate Trunk Development. *Dev Cell*. **41**, 243-261 e7.
- 988   **Gouti, M., Tsakiridis, A., Wymeersch, F. J., Huang, Y., Kleinjung, J., Wilson, V. & Briscoe, J.**  
989    (2014). In vitro generation of neuromesodermal progenitors reveals distinct roles for  
990    wnt signalling in the specification of spinal cord and paraxial mesoderm identity. *PLoS*  
991    *Biol.* **12**, e1001937.
- 992   **Hackland, J. O. S., Frith, T. J. R., Thompson, O., Marin Navarro, A., Garcia-Castro, M. I.,**  
993    **Unger, C. & Andrews, P. W.** (2017). Top-Down Inhibition of BMP Signaling Enables  
994    Robust Induction of hPSCs Into Neural Crest in Fully Defined, Xeno-free Conditions.  
995    *Stem Cell Reports*. **9**, 1043-1052.
- 996   **Hackland, J. O. S., Shelar, P. B., Sandhu, N., Prasad, M. S., Charney, R. M., Gomez, G. A.,**  
997    **Frith, T. J. R. & Garcia-Castro, M. I.** (2019). FGF Modulates the Axial Identity of Trunk  
998    hPSC-Derived Neural Crest but Not the Cranial-Trunk Decision. *Stem Cell Reports*. **12**,  
999    920-933.
- 1000   **Halder, S. K., Beauchamp, R. D. & Datta, P. K.** (2005). A specific inhibitor of TGF-beta receptor  
1001    kinase, SB-431542, as a potent antitumor agent for human cancers. *Neoplasia (New*  
1002    *York, N.Y.)*. **7**, 509-521.
- 1003   **Henrique, D., Abranches, E., Verrier, L. & Storey, K. G.** (2015). Neuromesodermal progenitors  
1004    and the making of the spinal cord. *Development*. **142**, 2864-75.
- 1005   **Hulsen, T., de Vlieg, J. & Alkema, W.** (2008). BioVenn - a web application for the comparison  
1006    and visualization of biological lists using area-proportional Venn diagrams. *BMC*  
1007    *Genomics*. **9**, 488.
- 1008   **Inman, G. J., Nicolas, F. J., Callahan, J. F., Harling, J. D., Gaster, L. M., Reith, A. D., Laping, N.**  
1009    **J. & Hill, C. S.** (2002). SB-431542 is a potent and specific inhibitor of transforming  
1010    growth factor-beta superfamily type I activin receptor-like kinase (ALK) receptors  
1011    ALK4, ALK5, and ALK7. *Mol Pharmacol*. **62**, 65-74.
- 1012   **Janesick, A., Nguyen, T. T. L., Aisaki, K.-i., Igarashi, K., Kitajima, S., Chandraratna, R. A. S.,**  
1013    **Kanno, J. & Blumberg, B.** (2014). Active repression by RAR $\gamma$  signaling is required for  
1014    vertebrate axial elongation. *Development*. **141**, 2260.
- 1015   **Janesick, A., Wu, S. C. & Blumberg, B.** (2015). Retinoic acid signaling and neuronal  
1016    differentiation. *Cell Mol Life Sci*. **72**, 1559-76.
- 1017   **Javali, A., Misra, A., Leonavicius, K., Acharyya, D., Vyas, B. & Sambasivan, R.** (2017). Co-  
1018    expression of Tbx6 and Sox2 identifies a novel transient neuromesoderm progenitor  
1019    cell state. *Development*. **144**, 4522-4529.
- 1020   **Jessell, T. M.** (2000). Neuronal specification in the spinal cord: inductive signals and  
1021    transcriptional codes. *Nat Rev Genet*. **1**, 20-9.
- 1022   **Jurberg, A. D., Aires, R., Varela-Lasheras, I., Novoa, A. & Mallo, M.** (2013). Switching axial  
1023    progenitors from producing trunk to tail tissues in vertebrate embryos. *Dev Cell*. **25**,  
1024    451-62.
- 1025   **Kadoya, K., Lu, P., Nguyen, K., Lee-Kubli, C., Kumamaru, H., Yao, L., Knackert, J., Poplawski,**  
1026    **G., Dulin, J. N., Strobl, H., et al.** (2016). Spinal cord reconstitution with homologous  
1027    neural grafts enables robust corticospinal regeneration. *Nature medicine*. **22**, 479-  
1028    487.

- 1029 Klein, E. S., Pino, M. E., Johnson, A. T., Davies, P. J., Nagpal, S., Thacher, S. M., Krasinski, G.  
1030 & Chandraratna, R. A. (1996). Identification and functional separation of retinoic acid  
1031 receptor neutral antagonists and inverse agonists. *J Biol Chem.* **271**, 22692-6.
- 1032 Koch, F., Scholze, M., Wittler, L., Schifferl, D., Sudheer, S., Grote, P., Timmermann, B.,  
1033 Macura, K. & Herrmann, B. G. (2017). Antagonistic Activities of Sox2 and Brachyury  
1034 Control the Fate Choice of Neuro-Mesodermal Progenitors. *Dev Cell.* **42**, 514-526 e7.
- 1035 Koide, T., Downes, M., Chandraratna, R. A., Blumberg, B. & Umesono, K. (2001). Active  
1036 repression of RAR signaling is required for head formation. *Genes Dev.* **15**, 2111-21.
- 1037 Kumamaru, H., Kadoya, K., Adler, A. F., Takashima, Y., Graham, L., Coppola, G. & Tuszyński,  
1038 M. H. (2018). Generation and post-injury integration of human spinal cord neural stem  
1039 cells. *Nat Methods.* **15**, 723-731.
- 1040 Le Dréau, G. & Martí, E. (2012). Dorsal–ventral patterning of the neural tube: A tale of three  
1041 signals. *Developmental Neurobiology.* **72**, 1471-1481.
- 1042 Lee, H., Shamy, G. A., Elkabetz, Y., Schofield, C. M., Harrision, N. L., Panagiotakos, G., Socci,  
1043 N. D., Tabar, V. & Studer, L. (2007). Directed differentiation and transplantation of  
1044 human embryonic stem cell-derived motoneurons. *Stem Cells.* **25**, 1931-9.
- 1045 Leung, A. W., Murdoch, B., Salem, A. F., Prasad, M. S., Gomez, G. A. & Garcia-Castro, M. I.  
1046 (2016). WNT/beta-catenin signaling mediates human neural crest induction via a pre-  
1047 neural border intermediate. *Development.* **143**, 398-410.
- 1048 Li, B. & Dewey, C. N. (2011). RSEM: accurate transcript quantification from RNA-Seq data with  
1049 or without a reference genome. *BMC Bioinformatics.* **12**, 323.
- 1050 Li, X., Liu, Z., Qiu, M. & Yang, Z. (2014). Sp8 plays a supplementary role to Pax6 in establishing  
1051 the pMN/p3 domain boundary in the spinal cord. *Development.* **141**, 2875-84.
- 1052 Li, X. J., Du, Z. W., Zarnowska, E. D., Pankratz, M., Hansen, L. O., Pearce, R. A. & Zhang, S. C.  
1053 (2005). Specification of motoneurons from human embryonic stem cells. *Nat*  
1054 *Biotechnol.* **23**, 215-21.
- 1055 Liem, K. F., Jessell, T. M. & Briscoe, J. (2000). Regulation of the neural patterning activity of  
1056 sonic hedgehog by secreted BMP inhibitors expressed by notochord and somites.  
1057 *Development.* **127**, 4855.
- 1058 Liem, K. F., Jr., Tremml, G. & Jessell, T. M. (1997). A role for the roof plate and its resident  
1059 TGFbeta-related proteins in neuronal patterning in the dorsal spinal cord. *Cell.* **91**,  
1060 127-38.
- 1061 Lippmann, E. S., Williams, C. E., Ruhl, D. A., Estevez-Silva, M. C., Chapman, E. R., Coon, J. J.  
1062 & Ashton, R. S. (2015). Deterministic HOX patterning in human pluripotent stem cell-  
1063 derived neuroectoderm. *Stem cell reports.* **4**, 632-644.
- 1064 Liu, P., Wakamiya, M., Shea, M. J., Albrecht, U., Behringer, R. R. & Bradley, A. (1999).  
1065 Requirement for Wnt3 in vertebrate axis formation. *Nat Genet.* **22**, 361-5.
- 1066 Lunn, J. S., Fishwick, K. J., Halley, P. A. & Storey, K. G. (2007). A spatial and temporal map of  
1067 FGF/Erk1/2 activity and response repertoires in the early chick embryo. *Dev Biol.* **302**,  
1068 536-52.
- 1069 Luu, B., Ellisor, D. & Zervas, M. (2011). The Lineage Contribution and Role of Gbx2 in Spinal  
1070 Cord Development. *PLOS ONE.* **6**, e20940.
- 1071 Martin, B. L. & Kimelman, D. (2008). Regulation of canonical Wnt signaling by Brachyury is  
1072 essential for posterior mesoderm formation. *Dev Cell.* **15**, 121-33.
- 1073 Martin, B. L. & Kimelman, D. (2010). Brachyury establishes the embryonic mesodermal  
1074 progenitor niche. *Genes & development.* **24**, 2778-2783.



- 1075 **Martin, M.** (2011). Cutadapt removes adapter sequences from high-throughput sequencing  
1076 reads. *EMBnet.journal; Vol 17, No 1: Next Generation Sequencing Data Analysis* DO -  
1077 10.14806/ej.17.1.200.
- 1078 **Mathis, L. & Nicolas, J. F.** (2000). Different clonal dispersion in the rostral and caudal mouse  
1079 central nervous system. *Development*. **127**, 1277.
- 1080 **Mazzoni, E. O., Mahony, S., Peljto, M., Patel, T., Thornton, S. R., McCuine, S., Reeder, C.,  
1081 Boyer, L. A., Young, R. A., Gifford, D. K., et al.** (2013). Saltatory remodeling of Hox  
1082 chromatin in response to rostrocaudal patterning signals. *Nat Neurosci*. **16**, 1191-  
1083 1198.
- 1084 **Metzis, V., Steinhäuser, S., Pakanavicius, E., Gouti, M., Stamatakis, D., Ivanovitch, K.,  
1085 Watson, T., Rayon, T., Mousavy Gharavy, S. N., Lovell-Badge, R., et al.** (2018).  
1086 Nervous System Regionalization Entails Axial Allocation before Neural Differentiation.  
1087 *Cell*. **175**, 1105-1118 e17.
- 1088 **Mohlin, S., Kunttas, E., Persson, C. U., Abdel-Haq, R., Castillo, A., Murko, C., Bronner, M. E.  
1089 & Kerosuo, L.** (2019). Maintaining multipotent trunk neural crest stem cells as self-  
1090 renewing crestospheres. *Dev Biol*. **447**, 137-146.
- 1091 **Mouilleau, V., Vaslin, C., Gribaudo, S., Robert, R., Nicolas, N., Jarrige, M., Terray, A., Lesueur,  
1092 L., Mathis, M. W., Croft, G., et al.** (2020). Dynamic extrinsic pacing of the  
1093 *HOX* clock in human axial progenitors controls motor neuron subtype  
1094 specification. *bioRxiv*. 2020.06.27.175646.
- 1095 **Nagoshi, N., Tsuji, O., Nakamura, M. & Okano, H.** (2019). Cell therapy for spinal cord injury  
1096 using induced pluripotent stem cells. *Regenerative therapy*. **11**, 75-80.
- 1097 **Neijts, R., Amin, S., van Rooijen, C. & Deschamps, J.** (2017). Cdx is crucial for the timing  
1098 mechanism driving colinear Hox activation and defines a trunk segment in the Hox  
1099 cluster topology. *Dev Biol*. **422**, 146-154.
- 1100 **Nichols, J. & Smith, A.** (2011). The origin and identity of embryonic stem cells. *Development*.  
1101 **138**, 3.
- 1102 **Nijssen, J., Comley, L. H. & Hedlund, E.** (2017). Motor neuron vulnerability and resistance in  
1103 amyotrophic lateral sclerosis. *Acta neuropathologica*. **133**, 863-885.
- 1104 **Olivera-Martinez, I., Schurch, N., Li, R. A., Song, J., Halley, P. A., Das, R. M., Burt, D. W.,  
1105 Barton, G. J. & Storey, K. G.** (2014). Major transcriptome re-organisation and abrupt  
1106 changes in signalling, cell cycle and chromatin regulation at neural differentiation in  
1107 vivo. *Development* **141**, 3266-3276.
- 1108 **Olivera-Martinez, I. & Storey, K. G.** (2007). Wnt signals provide a timing mechanism for the  
1109 FGF-retinoid differentiation switch during vertebrate body axis extension.  
1110 *Development*. **134**, 2125-35.
- 1111 **Peljto, M., Dasen, J. S., Mazzoni, E. O., Jessell, T. M. & Wichterle, H.** (2010). Functional  
1112 diversity of ESC-derived motor neuron subtypes revealed through intraspinal  
1113 transplantation. *Cell Stem Cell*. **7**, 355-66.
- 1114 **Philippidou, P. & Dasen, J. S.** (2013). Hox genes: choreographers in neural development,  
1115 architects of circuit organization. *Neuron*. **80**, 12-34.
- 1116 **Rayon, T., Stamatakis, D., Perez-Carrasco, R., Garcia-Perez, L., Barrington, C., Melchionda,  
1117 M., Exelby, K., Lazaro, J., Tybulewicz, V. L. J., Fisher, E. M. C., et al.** (2020). Species-  
1118 specific pace of development is associated with differences in protein stability.  
1119 *Science*. **369**,



- 1120 **Ribes, V., Stutzmann, F., Bianchetti, L., Guillemot, F., Dollé, P. & Le Roux, I.** (2008).  
1121 Combinatorial signalling controls Neurogenin2 expression at the onset of spinal  
1122 neurogenesis. *Developmental Biology*. **321**, 470-481.
- 1123 **Ritchie, M. E., Phipson, B., Wu, D., Hu, Y., Law, C. W., Shi, W. & Smyth, G. K.** (2015). limma  
1124 powers differential expression analyses for RNA-sequencing and microarray studies.  
1125 *Nucleic Acids Res.* **43**, e47.
- 1126 **Robinton, D. A., Chal, J., Lummertz da Rocha, E., Han, A., Yermalovich, A. V., Oginuma, M.,**  
1127 **Schlaeger, T. M., Sousa, P., Rodriguez, A., Urbach, A., et al.** (2019). The Lin28/let-7  
1128 Pathway Regulates the Mammalian Caudal Body Axis Elongation Program. *Dev Cell*.  
1129 **48**, 396-405.e3.
- 1130 **Sakai, Y., Meno, C., Fujii, H., Nishino, J., Shiratori, H., Saijoh, Y., Rossant, J. & Hamada, H.**  
1131 (2001). The retinoic acid-inactivating enzyme CYP26 is essential for establishing an  
1132 uneven distribution of retinoic acid along the antero-posterior axis within the mouse  
1133 embryo. *Genes & development*. **15**, 213-225.
- 1134 **Sandberg, M., Kallstrom, M. & Muhr, J.** (2005). Sox21 promotes the progression of vertebrate  
1135 neurogenesis. *Nat Neurosci*. **8**, 995-1001.
- 1136 **Sasai, N., Kutejova, E. & Briscoe, J.** (2014). Integration of signals along orthogonal axes of the  
1137 vertebrate neural tube controls progenitor competence and increases cell diversity.  
1138 *PLoS Biol.* **12**, e1001907.
- 1139 **Schindelin, J., Arganda-Carreras, I., Frise, E., Kaynig, V., Longair, M., Pietzsch, T., Preibisch,**  
1140 **S., Rueden, C., Saalfeld, S., Schmid, B., et al.** (2012). Fiji: an open-source platform for  
1141 biological-image analysis. *Nature Methods*. **9**, 676-682.
- 1142 **Shum, A. S., Poon, L. L., Tang, W. W., Koide, T., Chan, B. W., Leung, Y. C., Shiroishi, T. & Copp,**  
1143 **A. J.** (1999). Retinoic acid induces down-regulation of Wnt-3a, apoptosis and diversion  
1144 of tail bud cells to a neural fate in the mouse embryo. *Mech Dev*. **84**, 17-30.
- 1145 **Simoes-Costa, M. & Bronner, M. E.** (2015). Establishing neural crest identity: a gene  
1146 regulatory recipe. *Development*. **142**, 242-57.
- 1147 **Snyder, E. Y.** (2017). The state of the art in stem cell biology and regenerative medicine: the  
1148 end of the beginning. *Pediatric Research*. **83**, 191-204.
- 1149 **Storey, K. G., Goriely, A., Sargent, C. M., Brown, J. M., Burns, H. D., Abud, H. M. & Heath, J.**  
1150 **K.** (1998). Early posterior neural tissue is induced by FGF in the chick embryo.  
1151 *Development*. **125**, 473.
- 1152 **Stuhlmiller, T. J. & Garcia-Castro, M. I.** (2012). Current perspectives of the signaling pathways  
1153 directing neural crest induction. *Cell Mol Life Sci*. **69**, 3715-37.
- 1154 **Takada, S., Stark, K. L., Shea, M. J., Vassileva, G., McMahon, J. A. & McMahon, A. P.** (1994).  
1155 Wnt-3a regulates somite and tailbud formation in the mouse embryo. *Genes Dev*. **8**,  
1156 174-89.
- 1157 **Takemoto, T., Uchikawa, M., Kamachi, Y. & Kondoh, H.** (2006). Convergence of Wnt and FGF  
1158 signals in the genesis of posterior neural plate through activation of the Sox2 enhancer  
1159 N-1. *Development*. **133**, 297-306.
- 1160 **Takemoto, T., Uchikawa, M., Yoshida, M., Bell, D. M., Lovell-Badge, R., Papaioannou, V. E.**  
1161 **& Kondoh, H.** (2011). Tbx6-dependent Sox2 regulation determines neural or  
1162 mesodermal fate in axial stem cells. *Nature*. **470**, 394-8.
- 1163 **Thaler, J. P., Lee, S.-K., Jurata, L. W., Gill, G. N. & Pfaff, S. L.** (2002). LIM Factor Lhx3  
1164 Contributes to the Specification of Motor Neuron and Interneuron Identity through  
1165 Cell-Type-Specific Protein-Protein Interactions. *Cell*. **110**, 237-249.

- 1166 **Trawczynski, M., Liu, G., David, B. T. & Fessler, R. G.** (2019). Restoring Motor Neurons in  
1167 Spinal Cord Injury With Induced Pluripotent Stem Cells. *Front Cell Neurosci.* **13**, 369.
- 1168 **Tsakiridis, A., Huang, Y., Blin, G., Skylaki, S., Wymeersch, F., Osorno, R., Economou, C.,**  
1169 **Karagianni, E., Zhao, S., Lowell, S., et al.** (2014). Distinct Wnt-driven primitive streak-  
1170 like populations reflect in vivo lineage precursors. *Development.* **141**, 1209-21.
- 1171 **Turner, D. A., Hayward, P. C., Baillie-Johnson, P., Rue, P., Broome, R., Faunes, F. & Martinez**  
1172 **Arias, A.** (2014). Wnt/beta-catenin and FGF signalling direct the specification and  
1173 maintenance of a neuromesodermal axial progenitor in ensembles of mouse  
1174 embryonic stem cells. *Development.* **141**, 4243-53.
- 1175 **Tzouanacou, E., Wegener, A., Wymeersch, F. J., Wilson, V. & Nicolas, J. F.** (2009). Redefining  
1176 the progression of lineage segregations during mammalian embryogenesis by clonal  
1177 analysis. *Dev Cell.* **17**, 365-76.
- 1178 **van de Ven, C., Bialecka, M., Neijts, R., Young, T., Rowland, J. E., Stringer, E. J., Van Rooijen,**  
1179 **C., Meijlink, F., Novoa, A., Freund, J. N., et al.** (2011). Concerted involvement of  
1180 Cdx/Hox genes and Wnt signaling in morphogenesis of the caudal neural tube and  
1181 cloacal derivatives from the posterior growth zone. *Development.* **138**, 3451-62.
- 1182 **van den Akker, E., Forlani, S., Chawengsaksophak, K., de Graaff, W., Beck, F., Meyer, B. I. &**  
1183 **Deschamps, J.** (2002). Cdx1 and Cdx2 have overlapping functions in anteroposterior  
1184 patterning and posterior axis elongation. *Development.* **129**, 2181.
- 1185 **Verrier, L., Davidson, L., Gierlinski, M., Dady, A. & Storey, K. G.** (2018). Neural differentiation,  
1186 selection and transcriptomic profiling of human neuromesodermal progenitor-like  
1187 cells in vitro. *Development.* **145**,
- 1188 **Wang, H., Li, D., Zhai, Z., Zhang, X., Huang, W., Chen, X., Huang, L., Liu, H., Sun, J., Zou, Z., et**  
1189 **al.** (2019). Characterization and Therapeutic Application of Mesenchymal Stem Cells  
1190 with Neuromesodermal Origin from Human Pluripotent Stem Cells. *Theranostics.* **9**,  
1191 1683-1697.
- 1192 **Wichterle, H., Lieberam, I., Porter, J. A. & Jessell, T. M.** (2002). Directed Differentiation of  
1193 Embryonic Stem Cells into Motor Neurons. *Cell.* **110**, 385-397.
- 1194 **Wilson, V., Olivera-Martinez, I. & Storey, K. G.** (2009). Stem cells, signals and vertebrate body  
1195 axis extension. *Development.* **136**, 1591-604.
- 1196 **Wind, M., Gogolou, A., Manipur, I., Granata, I., Butler, L., Andrews, P. W., Barbaric, I., Ning,**  
1197 **K., Guarracino, M. R., Placzek, M., et al.** (2020). Defining the signalling determinants  
1198 of a posterior ventral spinal cord identity in human neuromesodermal progenitor  
1199 derivatives. *bioRxiv.* 2020.06.24.168625.
- 1200 **Wymeersch, F. J., Huang, Y., Blin, G., Cambray, N., Wilkie, R., Wong, F. C. & Wilson, V.** (2016).  
1201 Position-dependent plasticity of distinct progenitor types in the primitive streak. *Elife.*  
1202 **5**, e10042.
- 1203 **Yamaguchi, T. P., Takada, S., Yoshikawa, Y., Wu, N. & McMahon, A. P.** (1999). T (Brachyury)  
1204 is a direct target of Wnt3a during paraxial mesoderm specification. *Genes Dev.* **13**,  
1205 3185-90.
- 1206 **Zannino, D. A. & Sagerström, C. G.** (2015). An emerging role for prdm family genes in  
1207 dorsoventral patterning of the vertebrate nervous system. *Neural Development.* **10**,  
1208 24.
